# Supplementary material for: A collection of novel Lotus japonicus LORE1 mutants perturbed in the nodulation program induced by the Agrobacterium pusense strain IRBG74
Source: Front Plant Sci. 2024 Jan 5;14:1326766. doi: 10.3389/fpls.2023.1326766 (PMC10796720; doi:10.3389/fpls.2023.1326766)
Supplement: Supplementary Table 1 — Mapping of LORE1 elements in the mutant collection. [file Table_1.xlsx]

## Sheet: Total
Mutant line	Chromosome	Position	Reads	Location	Gene ID	Gene function
IM-116	LjG1.1_chr1	18146390	25	Endogenous LORE1
IM-116	LjG1.1_chr1	93087431	30	Endogenous LORE1
IM-116	LjG1.1_chr2	3995309	46	Endogenous LORE1
IM-116	LjG1.1_chr2	7736567	48	Endogenous LORE1
IM-116	LjG1.1_chr2	69977699	97	Endogenous LORE1
IM-116	LjG1.1_chr2	75214063	19	Endogenous LORE1
IM-116	LjG1.1_chr4	80380544	32	Endogenous LORE1
IM-116	LjG1.1_chr4	80873997	23	Endogenous LORE1
IM-116	LjG1.1_chr6	64916240	17	Endogenous LORE1
IM-116	LjG1.1_chr6	65769153	32	Endogenous LORE1
IM-118	LjG1.1_chr1	93087431	431	Endogenous LORE1
IM-118	LjG1.1_chr2	3995309	349	Endogenous LORE1
IM-118	LjG1.1_chr2	7736567	177	Endogenous LORE1
IM-118	LjG1.1_chr2	69977699	279	Endogenous LORE1
IM-118	LjG1.1_chr2	75214063	301	Endogenous LORE1
IM-118	LjG1.1_chr4	66568326	11	Endogenous LORE1
IM-118	LjG1.1_chr4	80380544	352	Endogenous LORE1
IM-118	LjG1.1_chr4	80873997	379	Endogenous LORE1
IM-118	LjG1.1_chr6	64916240	359	Endogenous LORE1
IM-118	LjG1.1_chr6	65769153	260	Endogenous LORE1
IM-21	LjG1.1_chr1	18146390	12	Endogenous LORE1
IM-21	LjG1.1_chr1	93087431	7	Endogenous LORE1
IM-21	LjG1.1_chr2	3995309	36	Endogenous LORE1
IM-21	LjG1.1_chr2	7736567	58	Endogenous LORE1
IM-21	LjG1.1_chr2	69977699	17	Endogenous LORE1
IM-21	LjG1.1_chr4	80380544	9	Endogenous LORE1
IM-21	LjG1.1_chr6	64916240	4	Endogenous LORE1
IM-25	LjG1.1_chr1	93087431	387	Endogenous LORE1
IM-25	LjG1.1_chr2	69977700	4	Intergenic
IM-25	LjG1.1_chr2	3995309	536	Endogenous LORE1
IM-25	LjG1.1_chr2	7736567	248	Endogenous LORE1
IM-25	LjG1.1_chr2	69977699	377	Endogenous LORE1
IM-25	LjG1.1_chr2	75214063	246	Endogenous LORE1
IM-25	LjG1.1_chr4	66568326	8	Endogenous LORE1
IM-25	LjG1.1_chr4	80380544	447	Endogenous LORE1
IM-25	LjG1.1_chr4	80873997	406	Endogenous LORE1
IM-25	LjG1.1_chr6	64916240	380	Endogenous LORE1
IM-25	LjG1.1_chr6	65769153	394	Endogenous LORE1
IM-53	LjG1.1_chr1	18146390	36	Endogenous LORE1
IM-53	LjG1.1_chr1	93087431	50	Endogenous LORE1
IM-53	LjG1.1_chr2	3995309	28	Endogenous LORE1
IM-53	LjG1.1_chr2	7736567	172	Endogenous LORE1
IM-53	LjG1.1_chr2	69977699	77	Endogenous LORE1
IM-53	LjG1.1_chr4	80380544	39	Endogenous LORE1
IM-53	LjG1.1_chr4	80873997	23	Endogenous LORE1
IM-53	LjG1.1_chr6	64916240	7	Endogenous LORE1
IM-53	LjG1.1_chr6	65769153	34	Endogenous LORE1
IM-56	LjG1.1_chr1	18146390	101	Endogenous LORE1
IM-56	LjG1.1_chr1	93087431	76	Endogenous LORE1
IM-56	LjG1.1_chr1	44153276	4	Intergenic
IM-56	LjG1.1_chr2	3995309	175	Endogenous LORE1
IM-56	LjG1.1_chr2	7736567	68	Endogenous LORE1
IM-56	LjG1.1_chr2	69977699	98	Endogenous LORE1
IM-56	LjG1.1_chr4	80380544	97	Endogenous LORE1
IM-56	LjG1.1_chr6	64916240	54	Endogenous LORE1
IM-56	LjG1.1_chr6	65769153	88	Endogenous LORE1
IM-58	LjG1.1_chr1	93087431	25	Endogenous LORE1
IM-58	LjG1.1_chr2	3995309	76	Endogenous LORE1
IM-58	LjG1.1_chr2	7736567	96	Endogenous LORE1
IM-58	LjG1.1_chr2	69977699	102	Endogenous LORE1
IM-58	LjG1.1_chr2	75214063	17	Endogenous LORE1
IM-58	LjG1.1_chr4	80380544	14	Endogenous LORE1
IM-58	LjG1.1_chr4	80873997	15	Endogenous LORE1
IM-58	LjG1.1_chr6	64916240	21	Endogenous LORE1
IM-58	LjG1.1_chr6	65769153	43	Endogenous LORE1
IM-59	LjG1.1_chr1	18146390	8	Endogenous LORE1
IM-59	LjG1.1_chr1	93087431	139	Endogenous LORE1
IM-59	LjG1.1_chr2	3995309	116	Endogenous LORE1
IM-59	LjG1.1_chr2	7736567	650	Endogenous LORE1
IM-59	LjG1.1_chr2	69977699	292	Endogenous LORE1
IM-59	LjG1.1_chr4	66568326	14	Endogenous LORE1
IM-59	LjG1.1_chr4	80380544	149	Endogenous LORE1
IM-59	LjG1.1_chr4	80873997	25	Endogenous LORE1
IM-59	LjG1.1_chr6	64916240	113	Endogenous LORE1
IM-59	LjG1.1_chr6	65769153	53	Endogenous LORE1
IM-8	LjG1.1_chr1	93087431	353	Endogenous LORE1
IM-8	LjG1.1_chr2	3995309	403	Endogenous LORE1
IM-8	LjG1.1_chr2	7736567	352	Endogenous LORE1
IM-8	LjG1.1_chr2	69977699	346	Endogenous LORE1
IM-8	LjG1.1_chr2	75214063	8	Endogenous LORE1
IM-8	LjG1.1_chr4	66568326	11	Endogenous LORE1
IM-8	LjG1.1_chr4	80380544	252	Endogenous LORE1
IM-8	LjG1.1_chr4	80873997	206	Endogenous LORE1
IM-8	LjG1.1_chr6	64916240	363	Endogenous LORE1
IM-8	LjG1.1_chr6	65769153	346	Endogenous LORE1
IM-8	LjG1.1_chr2	46676659	7	Exon	LotjaGi2g1v0127100	S-acyltransferase
IM-8	LjG1.1_chr3	92911417	6	Exon	LotjaGi3g1v0512000	Har1
IM-A116	LjG1.1_chr1	93087431	37	Endogenous LORE1
IM-A116	LjG1.1_chr2	3995309	56	Endogenous LORE1
IM-A116	LjG1.1_chr2	7736567	378	Endogenous LORE1
IM-A116	LjG1.1_chr2	69977699	177	Endogenous LORE1
IM-A116	LjG1.1_chr2	75214063	37	Endogenous LORE1
IM-A116	LjG1.1_chr4	66568326	4	Endogenous LORE1
IM-A116	LjG1.1_chr4	80380544	56	Endogenous LORE1
IM-A116	LjG1.1_chr4	80873997	33	Endogenous LORE1
IM-A116	LjG1.1_chr6	64916240	38	Endogenous LORE1
IM-A116	LjG1.1_chr6	65769153	66	Endogenous LORE1
IM-A19	LjG1.1_chr1	18146390	181	Endogenous LORE1
IM-A19	LjG1.1_chr1	93087431	138	Endogenous LORE1
IM-A19	LjG1.1_chr2	3995309	374	Endogenous LORE1
IM-A19	LjG1.1_chr5	16307751	10	Intergenic
IM-A19	LjG1.1_chr2	7736567	468	Endogenous LORE1
IM-A19	LjG1.1_chr2	69977699	116	Endogenous LORE1
IM-A19	LjG1.1_chr2	75214063	36	Endogenous LORE1
IM-A19	LjG1.1_chr4	80380544	61	Endogenous LORE1
IM-A19	LjG1.1_chr6	64916240	709	Endogenous LORE1
IM-A19	LjG1.1_chr6	65769153	45	Endogenous LORE1
IM-A20	LjG1.1_chr1	93087431	703	Endogenous LORE1
IM-A20	LjG1.1_chr2	3995309	611	Endogenous LORE1
IM-A20	LjG1.1_chr2	7736567	362	Endogenous LORE1
IM-A20	LjG1.1_chr2	69977699	600	Endogenous LORE1
IM-A20	LjG1.1_chr4	66568326	21	Endogenous LORE1
IM-A20	LjG1.1_chr4	80380544	645	Endogenous LORE1
IM-A20	LjG1.1_chr4	80873997	623	Endogenous LORE1
IM-A20	LjG1.1_chr6	64916240	681	Endogenous LORE1
IM-A20	LjG1.1_chr6	65769153	605	Endogenous LORE1
IM-A39	LjG1.1_chr1	93087431	38	Endogenous LORE1
IM-A39	LjG1.1_chr2	3995309	106	Endogenous LORE1
IM-A39	LjG1.1_chr2	7736567	82	Endogenous LORE1
IM-A39	LjG1.1_chr2	69977699	95	Endogenous LORE1
IM-A39	LjG1.1_chr4	80380544	34	Endogenous LORE1
IM-A39	LjG1.1_chr6	64916240	55	Endogenous LORE1
IM-A39	LjG1.1_chr6	65769153	79	Endogenous LORE1
IM-A55	LjG1.1_chr1	18146390	187	Endogenous LORE1
IM-A55	LjG1.1_chr1	93087431	139	Endogenous LORE1
IM-A55	LjG1.1_chr2	3995309	192	Endogenous LORE1
IM-A55	LjG1.1_chr2	7736567	546	Endogenous LORE1
IM-A55	LjG1.1_chr2	69977699	216	Endogenous LORE1
IM-A55	LjG1.1_chr2	75214063	126	Endogenous LORE1
IM-A55	LjG1.1_chr4	66568326	12	Endogenous LORE1
IM-A55	LjG1.1_chr4	80380544	209	Endogenous LORE1
IM-A55	LjG1.1_chr4	80873997	149	Endogenous LORE1
IM-A55	LjG1.1_chr6	64916240	223	Endogenous LORE1
IM-A55	LjG1.1_chr6	65769153	231	Endogenous LORE1
IM-A55	LjG1.1_chr1	119612095	4	UTR	LotjaGi1g1v0639600	Ricin B lectin domain-containing protein
IM-A55	LjG1.1_chr1	133181184	4	UTR	LotjaGi1g1v0758400_LC	Regulator of chromosome condensation (RCC1)
IM-A55	LjG1.1_chr4	80752406	24	Intron	LotjaGi4g1v0433200	Trichome birefringence-like protein
IM-A60	LjG1.1_chr1	18146390	8	Endogenous LORE1
IM-A60	LjG1.1_chr1	93087431	175	Endogenous LORE1
IM-A60	LjG1.1_chr2	3995309	266	Endogenous LORE1
IM-A60	LjG1.1_chr2	7736567	692	Endogenous LORE1
IM-A60	LjG1.1_chr2	7286693	14	Intergenic
IM-A60	LjG1.1_chr2	12510352	11	Intergenic
IM-A60	LjG1.1_chr2	34779240	7	Intergenic
IM-A60	LjG1.1_chr6	37002219	10	Intergenic
IM-A60	LjG1.1_chr2	69977699	619	Endogenous LORE1
IM-A60	LjG1.1_chr2	75214063	95	Endogenous LORE1
IM-A60	LjG1.1_chr4	66568326	11	Endogenous LORE1
IM-A60	LjG1.1_chr4	80380544	155	Endogenous LORE1
IM-A60	LjG1.1_chr6	6000551	4	Intergenic
IM-A60	LjG1.1_chr6	64916240	414	Endogenous LORE1
IM-A60	LjG1.1_chr6	65769153	200	Endogenous LORE1
IM-A60	LjG1.1_chr2	12156058	10	Intron	LotjaGi2g1v0058300	Laminin subunit gamma-1
IM-A68	LjG1.1_chr1	18146390	32	Endogenous LORE1
IM-A68	LjG1.1_chr1	93087431	59	Endogenous LORE1
IM-A68	LjG1.1_chr2	3995309	48	Endogenous LORE1
IM-A68	LjG1.1_chr2	7736567	38	Endogenous LORE1
IM-A68	LjG1.1_chr5	30584147	4	Intergenic
IM-A68	LjG1.1_chr2	69977699	88	Endogenous LORE1
IM-A68	LjG1.1_chr2	75214063	23	Endogenous LORE1
IM-A68	LjG1.1_chr4	66568326	5	Endogenous LORE1
IM-A68	LjG1.1_chr4	80380544	61	Endogenous LORE1
IM-A68	LjG1.1_chr4	80873997	26	Endogenous LORE1
IM-A68	LjG1.1_chr6	64916240	96	Endogenous LORE1
IM-A68	LjG1.1_chr6	65769153	82	Endogenous LORE1
IM-A68	LjG1.1_chr2	46676659	5	Exon	LotjaGi2g1v0127100	S-acyltransferase
IM-A68	LjG1.1_chr2	90471961	7	Intron	LotjaGi2g1v0407500_LC	Cytosolic Fe-S cluster assembly factor NAR1
IM-A68	LjG1.1_chr3	92911417	5	Exon	LotjaGi3g1v0512000	Har1
IM-A68	LjG1.1_chr4	2680451	6	Exon	LotjaGi4g1v0022000	Chromodomain-helicase-DNA-binding
IM-A68	LjG1.1_chr6	62128126	7	Exon	LotjaGi6g1v0303800	Prolyl 4-hydroxylase subunit alpha-like protein
IM-D11	LjG1.1_chr1	37252915	5	Intron	LotjaGi1g1v0189800	Dentin sialophosphoprotein-like protein
IM-D11	LjG1.1_chr1	18146390	7	Endogenous LORE1
IM-D11	LjG1.1_chr1	93087431	17	Endogenous LORE1
IM-D11	LjG1.1_chr2	3995309	21	Endogenous LORE1
IM-D11	LjG1.1_chr2	7736567	77	Endogenous LORE1
IM-D11	LjG1.1_chr2	69977699	39	Endogenous LORE1
IM-D11	LjG1.1_chr2	75214063	23	Endogenous LORE1
IM-D11	LjG1.1_chr4	80380544	18	Endogenous LORE1
IM-D11	LjG1.1_chr4	80873997	20	Endogenous LORE1
IM-D11	LjG1.1_chr6	64916240	22	Endogenous LORE1
IM-D11	LjG1.1_chr6	65769153	22	Endogenous LORE1
IM-D14	LjG1.1_chr1	93087431	170	Endogenous LORE1
IM-D14	LjG1.1_chr2	3995309	423	Endogenous LORE1
IM-D14	LjG1.1_chr2	7736567	338	Endogenous LORE1
IM-D14	LjG1.1_chr2	69977699	407	Endogenous LORE1
IM-D14	LjG1.1_chr2	75214063	10	Endogenous LORE1
IM-D14	LjG1.1_chr4	66568326	21	Endogenous LORE1
IM-D14	LjG1.1_chr4	80380544	106	Endogenous LORE1
IM-D14	LjG1.1_chr4	80873997	31	Endogenous LORE1
IM-D14	LjG1.1_chr6	64916240	516	Endogenous LORE1
IM-D14	LjG1.1_chr6	65769153	403	Endogenous LORE1
IM-D18	LjG1.1_chr2	26484287	8	Intron	LotjaGi2g1v0090100	Cleavage stimulation factor subunit
IM-D18	LjG1.1_chr2	43588417	12	Intron	LotjaGi2g1v0119300	Protein kinase family protein
IM-D18	LjG1.1_chr2	85543449	12	Intron	LotjaGi2g1v0347900	Late embryogenesis abundant (LEA)hydroxyproline-rich glycoprotein
IM-D18	LjG1.1_chr2	86599068	5	Intron	LotjaGi2g1v0368500	NDX1 homeobox protein
IM-D18	LjG1.1_chr2	87485316	57	Exon	LotjaGi2g1v0377600	Peptide methionine sulfoxide reductase msrB
IM-D18	LjG1.1_chr2	90471961	177	Intron	LotjaGi2g1v0407500_LC	NDX1 homeobox protein
IM-D18	LjG1.1_chr3	5520270	41	Promoter	LotjaGi3g1v0052700	heat-inducible transcription repressor
IM-D18	LjG1.1_chr3	53305926	81	Exon	LotjaGi3g1v0273500	RHO guanyl-nucleotide exchange factor
IM-D18	LjG1.1_chr3	93834698	34	Exon	LotjaGi3g1v0521600	Amino acid permease
IM-D18	LjG1.1_chr3	97531106	6	Intron	LotjaGi3g1v0557400_LC	DEAD-box ATP-dependent RNA helicase
IM-D18	LjG1.1_chr1	18146390	64	Endogenous LORE1
IM-D18	LjG1.1_chr1	26198337	4	Intergenic
IM-D18	LjG1.1_chr1	93087431	179	Endogenous LORE1
IM-D18	LjG1.1_chr2	3995309	259	Endogenous LORE1
IM-D18	LjG1.1_chr2	7736567	188	Endogenous LORE1
IM-D18	LjG1.1_chr2	69977699	188	Endogenous LORE1
IM-D18	LjG1.1_chr2	75214063	18	Endogenous LORE1
IM-D18	LjG1.1_chr3	90756903	18	Intergenic
IM-D18	LjG1.1_chr4	66568326	9	Endogenous LORE1
IM-D18	LjG1.1_chr4	80380544	88	Endogenous LORE1
IM-D18	LjG1.1_chr5	61369719	82	Intergenic
IM-D18	LjG1.1_chr6	64916240	229	Endogenous LORE1
IM-D18	LjG1.1_chr6	65769153	226	Endogenous LORE1
IM-D18	LjG1.1_chr5	3663187	65	Intron	LotjaGi5g1v0018900	Leishmanolysin-like peptidase
IM-D18	LjG1.1_chr6	8368183	67	Intron	LotjaGi6g1v0044400	Eukaryotic translation initiation factor 2 subunit
IM-D19	LjG1.1_chr1	93087431	314	Endogenous LORE1
IM-D19	LjG1.1_chr2	3995309	426	Endogenous LORE1
IM-D19	LjG1.1_chr2	7736567	367	Endogenous LORE1
IM-D19	LjG1.1_chr2	69977699	380	Endogenous LORE1
IM-D19	LjG1.1_chr2	75214063	59	Endogenous LORE1
IM-D19	LjG1.1_chr4	66568326	10	Endogenous LORE1
IM-D19	LjG1.1_chr4	80380544	186	Endogenous LORE1
IM-D19	LjG1.1_chr4	80873997	186	Endogenous LORE1
IM-D19	LjG1.1_chr6	64916240	484	Endogenous LORE1
IM-D19	LjG1.1_chr6	65769153	334	Endogenous LORE1
IM-D21	LjG1.1_chr2	80642430	55	Intron	LotjaGi2g1v0330800	Endoribonuclease E-like protein
IM-D21	LjG1.1_chr1	18146390	185	Endogenous LORE1
IM-D21	LjG1.1_chr1	93087431	165	Endogenous LORE1
IM-D21	LjG1.1_chr1	113864726	184	Intergenic
IM-D21	LjG1.1_chr2	3995309	232	Endogenous LORE1
IM-D21	LjG1.1_chr2	7736567	127	Endogenous LORE1
IM-D21	LjG1.1_chr2	69977699	250	Endogenous LORE1
IM-D21	LjG1.1_chr2	75214063	109	Endogenous LORE1
IM-D21	LjG1.1_chr4	52081008	64	Intergenic
IM-D21	LjG1.1_chr4	66568326	7	Endogenous LORE1
IM-D21	LjG1.1_chr4	80380544	212	Endogenous LORE1
IM-D21	LjG1.1_chr4	80873997	221	Endogenous LORE1
IM-D21	LjG1.1_chr6	3776424	34	Intergenic
IM-D21	LjG1.1_chr6	64916240	280	Endogenous LORE1
IM-D21	LjG1.1_chr6	65769153	147	Endogenous LORE1
IM-D21	LjG1.1_chr4	2680451	202	Exon	LotjaGi4g1v0022000	Chromodomain-helicase-DNA-binding family protein
IM-D21	LjG1.1_chr4	13313124	57	Intron	LotjaGi4g1v0098500	Protein FRIGIDA
IM-D21	LjG1.1_chr4	59015450	115	Exon	LotjaGi4g1v0241900	Nuclear mitotic apparatus 1
IM-D21	LjG1.1_chr5	48616325	115	UTR	LotjaGi5g1v0192700	Ion channel pollux-like protein
IM-D22	LjG1.1_chr1	18730968	31	UTR	LotjaGi1g1v0118700_LC	putative disease resistance protein RGA3
IM-D22	LjG1.1_chr2	74672064	73	Exon	LotjaGi2g1v0274900	Zinc finger protein
IM-D22	LjG1.1_chr2	82070590	64	Exon	LotjaGi2g1v0343300	CYCLOPS
IM-D22	LjG1.1_chr1	18146390	52	Endogenous LORE1
IM-D22	LjG1.1_chr1	93087431	117	Endogenous LORE1
IM-D22	LjG1.1_chr2	3995309	214	Endogenous LORE1
IM-D22	LjG1.1_chr2	7736567	144	Endogenous LORE1
IM-D22	LjG1.1_chr2	69977699	173	Endogenous LORE1
IM-D22	LjG1.1_chr2	75274391	62	Intergenic
IM-D22	LjG1.1_chr3	16283242	5	Intergenic
IM-D22	LjG1.1_chr4	52081008	4	Intergenic
IM-D22	LjG1.1_chr4	66568326	8	Endogenous LORE1
IM-D22	LjG1.1_chr4	80380544	58	Endogenous LORE1
IM-D22	LjG1.1_chr4	80873997	56	Endogenous LORE1
IM-D22	LjG1.1_chr6	21709050	55	Intergenic
IM-D22	LjG1.1_chr4	2680451	4	Exon	LotjaGi4g1v0022000	Chromodomain-helicase-DNA-binding family protein
IM-D22	LjG1.1_chr6	64916240	207	Endogenous LORE1
IM-D22	LjG1.1_chr6	65769153	155	Endogenous LORE1
IM-D22	LjG1.1_chr6	65865154	26	Intergenic
IM-D22	LjG1.1_chr5	47301225	50	UTR	LotjaGi5g1v0186200	Sieve element occlusion protein
IM-D22	LjG1.1_chr5	48616325	4	UTR	LotjaGi5g1v0192700	Ion channel pollux-like protein
IM-D22	LjG1.1_chr6	47603340	90	Exon	LotjaGi6g1v0183200	Cellulose synthase
IM-D22	LjG1.1_chr6	56500638	24	Exon	LotjaGi6g1v0252600	Pectin lyase-like superfamily protein
IM-D24	LjG1.1_chr1	458177	24	Intron	LotjaGi1g1v0001400	Niemann-Pick C1 protein
IM-D24	LjG1.1_chr1	18146390	81	Endogenous LORE1
IM-D24	LjG1.1_chr1	93087431	305	Endogenous LORE1
IM-D24	LjG1.1_chr2	3995309	340	Endogenous LORE1
IM-D24	LjG1.1_chr2	7736567	191	Endogenous LORE1
IM-D24	LjG1.1_chr2	69977699	234	Endogenous LORE1
IM-D24	LjG1.1_chr4	66568326	4	Intergenic
IM-D24	LjG1.1_chr2	75214063	147	Endogenous LORE1
IM-D24	LjG1.1_chr4	80380544	336	Endogenous LORE1
IM-D24	LjG1.1_chr4	80873997	353	Endogenous LORE1
IM-D24	LjG1.1_chr6	64916240	288	Endogenous LORE1
IM-D24	LjG1.1_chr6	65769153	252	Endogenous LORE1
IM-D24	LjG1.1_chr2	82442447	38	UTR	LotjaGi2g1v0347900	Late embryogenesis abundant (LEA)hydroxyproline-rich glycoprotein
IM-D24	LjG1.1_chr3	85406645	26	UTR	LotjaGi3g1v0441300	H/ACA ribonucleoprotein complex non-core subunit NAF1
IM-D24	LjG1.1_chr4	54821094	13	Exon	LotjaGi4g1v0234300_LC	Poly [ADP]-ribose] polymerase
IM-D24	LjG1.1_chr5	67923998	16	UTR	LotjaGi5g1v0364000	Eukaryotic translation initiation factor 3
IM-D24	LjG1.1_chr6	42609645	156	UTR	LotjaGi6g1v0150100_LC	disease resistance family protein / LRR family protein
IM-D24	LjG1.1_chr6	63466952	27	Exon	LotjaGi6g1v0317000	Aquaporin
IM-D25	LjG1.1_chr1	18146390	40	Endogenous LORE1
IM-D25	LjG1.1_chr1	93087431	170	Endogenous LORE1
IM-D25	LjG1.1_chr2	3995309	236	Endogenous LORE1
IM-D25	LjG1.1_chr2	7736567	252	Endogenous LORE1
IM-D25	LjG1.1_chr2	69977699	127	Endogenous LORE1
IM-D25	LjG1.1_chr2	75214063	87	Endogenous LORE1
IM-D25	LjG1.1_chr1	91097892	38	Intergenic
IM-D25	LjG1.1_chr5	4092403	13	Intergenic
IM-D25	LjG1.1_chr4	66568326	5	Endogenous LORE1
IM-D25	LjG1.1_chr4	80380544	114	Endogenous LORE1
IM-D25	LjG1.1_chr4	80873997	54	Endogenous LORE1
IM-D25	LjG1.1_chr6	64916240	24	Endogenous LORE1
IM-D25	LjG1.1_chr6	65769153	157	Endogenous LORE1
IM-D25	LjG1.1_chr2	72767929	10	Exon	LotjaGi2g1v0259700	Starch synthase
IM-D25	LjG1.1_chr4	12017306	6	Intron	LotjaGi4g1v0090700	myb-like protein
IM-D26	LjG1.1_chr1	18146390	68	Endogenous LORE1
IM-D26	LjG1.1_chr1	93087431	123	Endogenous LORE1
IM-D26	LjG1.1_chr2	3995309	311	Endogenous LORE1
IM-D26	LjG1.1_chr2	7736567	426	Endogenous LORE1
IM-D26	LjG1.1_chr2	69977699	414	Endogenous LORE1
IM-D26	LjG1.1_chr2	75214063	92	Endogenous LORE1
IM-D26	LjG1.1_chr3	88951812	6	Intergenic
IM-D26	LjG1.1_chr4	80380544	99	Endogenous LORE1
IM-D26	LjG1.1_chr4	80873997	11	Endogenous LORE1
IM-D26	LjG1.1_chr6	64916240	333	Endogenous LORE1
IM-D26	LjG1.1_chr6	65769153	104	Endogenous LORE1
IM-D30	LjG1.1_chr1	18146390	20	Endogenous LORE1
IM-D30	LjG1.1_chr1	93087431	77	Endogenous LORE1
IM-D30	LjG1.1_chr2	3995309	67	Endogenous LORE1
IM-D30	LjG1.1_chr2	7736567	166	Endogenous LORE1
IM-D30	LjG1.1_chr2	69977699	146	Endogenous LORE1
IM-D30	LjG1.1_chr2	75214063	15	Endogenous LORE1
IM-D30	LjG1.1_chr3	25669380	6	Intergenic
IM-D30	LjG1.1_chr5	4092403	4	Intergenic
IM-D30	LjG1.1_chr4	80380544	47	Endogenous LORE1
IM-D30	LjG1.1_chr4	80873997	28	Endogenous LORE1
IM-D30	LjG1.1_chr6	64916240	119	Endogenous LORE1
IM-D30	LjG1.1_chr6	65769153	91	Endogenous LORE1
IM-D30	LjG1.1_chr2	72767929	6	Exon	LotjaGi2g1v0259700	Starch synthase
IM-D30	LjG1.1_chr2	75554089	8	Intron	LotjaGi2g1v0283100	SOSS complex subunit B like
IM-D30	LjG1.1_chr2	92887255	23	Intron	LotjaGi2g1v0431900	Generative cell specific-1
IM-D30	LjG1.1_chr3	66783772	14	Intron	LotjaGi3g1v0315400	Dentin sialophosphoprotein-related
IM-D30	LjG1.1_chr4	12017306	6	Intron	LotjaGi4g1v0090700	myb-like protein
IM-D30	LjG1.1_chr4	28550673	19	UTR	LotjaGi4g1v0160100	Very-long-chain (3R)-3-hydroxyacyl-CoA dehydratase
IM-D34	LjG1.1_chr1	18730968	9	UTR	LotjaGi1g1v0118700_LC	putative disease resistance protein RGA3
IM-D34	LjG1.1_chr1	18146390	110	Endogenous LORE1
IM-D34	LjG1.1_chr1	93087431	248	Endogenous LORE1
IM-D34	LjG1.1_chr2	3995309	263	Endogenous LORE1
IM-D34	LjG1.1_chr2	7736567	220	Endogenous LORE1
IM-D34	LjG1.1_chr2	69977699	307	Endogenous LORE1
IM-D34	LjG1.1_chr2	75214063	107	Endogenous LORE1
IM-D34	LjG1.1_chr4	66568326	19	Endogenous LORE1
IM-D34	LjG1.1_chr1	91097892	10	Intergenic
IM-D34	LjG1.1_chr1	113864726	29	Intergenic
IM-D34	LjG1.1_chr2	43588417	4	Intron	LotjaGi2g1v0119300	Protein kinase family protein
IM-D34	LjG1.1_chr2	75274391	20	Intergenic
IM-D34	LjG1.1_chr3	88951812	4	Intergenic
IM-D34	LjG1.1_chr3	90756903	11	Intergenic
IM-D34	LjG1.1_chr2	72767929	14	Exon	LotjaGi2g1v0259700	Starch synthase
IM-D34	LjG1.1_chr2	74672064	12	Exon	LotjaGi2g1v0274900	Zinc finger protein
IM-D34	LjG1.1_chr4	52081008	13	Intergenic
IM-D34	LjG1.1_chr5	4092403	19	Intergenic
IM-D34	LjG1.1_chr5	61369719	19	Intergenic
IM-D34	LjG1.1_chr6	21709050	11	Intergenic
IM-D34	LjG1.1_chr6	65865154	6	Intergenic
IM-D34	LjG1.1_chr4	80380544	143	Endogenous LORE1
IM-D34	LjG1.1_chr4	80873997	132	Endogenous LORE1
IM-D34	LjG1.1_chr6	64916240	339	Endogenous LORE1
IM-D34	LjG1.1_chr6	65769153	279	Endogenous LORE1
IM-D34	LjG1.1_chr2	80642430	17	Intron	LotjaGi2g1v0330800	Endoribonuclease E-like protein
IM-D34	LjG1.1_chr2	82070590	15	Exon	LotjaGi2g1v0343300	CYCLOPS
IM-D34	LjG1.1_chr2	87485316	13	Exon	LotjaGi2g1v0377600	Peptide methionine sulfoxide reductase msrB
IM-D34	LjG1.1_chr2	90471961	53	Intron	LotjaGi2g1v0407500_LC	Cytosolic Fe-S cluster assembly factor NAR1
IM-D34	LjG1.1_chr3	5520270	14	Promoter	LotjaGi3g1v0052700	heat-inducible transcription repressor
IM-D34	LjG1.1_chr3	53305926	13	Exon	LotjaGi3g1v0273500	RHO guanyl-nucleotide exchange factor
IM-D34	LjG1.1_chr3	92911417	6	Exon	LotjaGi3g1v0512000	Har1
IM-D34	LjG1.1_chr3	93834698	4	Exon	LotjaGi3g1v0521600	Amino acid permease
IM-D34	LjG1.1_chr3	97531106	6	Intron	LotjaGi3g1v0557400_LC	DEAD-box ATP-dependent RNA helicase
IM-D34	LjG1.1_chr4	2680451	22	Exon	LotjaGi4g1v0022000	Chromodomain-helicase-DNA-binding family protein
IM-D34	LjG1.1_chr4	12017306	14	Intron	LotjaGi4g1v0090700	myb-like protein
IM-D34	LjG1.1_chr4	13313124	13	Intron	LotjaGi4g1v0098500	Protein FRIGIDA
IM-D34	LjG1.1_chr4	59015450	8	Exon	LotjaGi4g1v0241900	Nuclear mitotic apparatus 1
IM-D34	LjG1.1_chr5	3663187	7	Intron	LotjaGi5g1v0018900	Leishmanolysin-like peptidase
IM-D34	LjG1.1_chr5	47301225	11	UTR	LotjaGi5g1v0186200	Sieve element occlusion protein
IM-D34	LjG1.1_chr5	48616325	9	UTR	LotjaGi5g1v0192700	Ion channel pollux-like protein
IM-D34	LjG1.1_chr6	8368183	15	Intron	LotjaGi6g1v0044400	Eukaryotic translation initiation factor 2 subunit
IM-D34	LjG1.1_chr6	42609645	20	Exon	LotjaGi6g1v0150100_LC	disease resistance family protein
IM-D34	LjG1.1_chr6	47603340	20	Exon	LotjaGi6g1v0183200	Cellulose synthase
IM-D34	LjG1.1_chr6	62128126	4	Exon	LotjaGi6g1v0303800	Prolyl 4-hydroxylase subunit alpha-like protein
IM-D8	LjG1.1_chr1	18146390	18	Endogenous LORE1
IM-D8	LjG1.1_chr1	93087431	40	Endogenous LORE1
IM-D8	LjG1.1_chr2	3995309	38	Endogenous LORE1
IM-D8	LjG1.1_chr2	7736567	23	Endogenous LORE1
IM-D8	LjG1.1_chr2	69977699	25	Endogenous LORE1
IM-D8	LjG1.1_chr2	75214063	6	Endogenous LORE1
IM-D8	LjG1.1_chr3	25669380	4	Intergenic
IM-D8	LjG1.1_chr4	80380544	15	Endogenous LORE1
IM-D8	LjG1.1_chr4	80873997	30	Endogenous LORE1
IM-D8	LjG1.1_chr6	64916240	46	Endogenous LORE1
IM-D8	LjG1.1_chr6	65769153	40	Endogenous LORE1
IM-D9	LjG1.1_chr1	18146390	41	Endogenous LORE1
IM-D9	LjG1.1_chr1	93087431	45	Endogenous LORE1
IM-D9	LjG1.1_chr2	3995309	43	Endogenous LORE1
IM-D9	LjG1.1_chr2	7736567	113	Endogenous LORE1
IM-D9	LjG1.1_chr2	69977699	109	Endogenous LORE1
IM-D9	LjG1.1_chr2	75214063	6	Endogenous LORE1
IM-D9	LjG1.1_chr4	80380544	36	Endogenous LORE1
IM-D9	LjG1.1_chr4	66568326	4	Intergenic
IM-D9	LjG1.1_chr4	80873997	17	Endogenous LORE1
IM-D9	LjG1.1_chr6	64916240	60	Endogenous LORE1
IM-D9	LjG1.1_chr6	65769153	44	Endogenous LORE1
IM-MY21	LjG1.1_chr1	80506185	189	Intron	LotjaGi1g1v0342700	Golgi-body localization protein domain isoform
IM-MY21	LjG1.1_chr1	133181184	335	UTR	LotjaGi1g1v0758400_LC	Regulator of chromosome condensation (RCC1)
IM-MY21	LjG1.1_chr2	26487328	184	Intron	LotjaGi2g1v0090100	Cleavage stimulation factor subunit
IM-MY21	LjG1.1_chr2	46676659	211	Exon	LotjaGi2g1v0127100	S-acyltransferase
IM-MY21	LjG1.1_chr1	18146390	307	Endogenous LORE1
IM-MY21	LjG1.1_chr1	93087431	367	Endogenous LORE1
IM-MY21	LjG1.1_chr2	3995309	282	Endogenous LORE1
IM-MY21	LjG1.1_chr2	7736567	155	Endogenous LORE1
IM-MY21	LjG1.1_chr2	69977699	259	Endogenous LORE1
IM-MY21	LjG1.1_chr2	75214063	253	Endogenous LORE1
IM-MY21	LjG1.1_chr3	88951812	165	Intergenic
IM-MY21	LjG1.1_chr4	66568326	5	Endogenous LORE1
IM-MY21	LjG1.1_chr4	80380544	332	Endogenous LORE1
IM-MY21	LjG1.1_chr6	64916240	301	Endogenous LORE1
IM-MY21	LjG1.1_chr6	65769153	274	Endogenous LORE1
IM-MY21	LjG1.1_chr3	92911417	270	Exon	LotjaGi3g1v0512000	Har1
IM-MY21	LjG1.1_chr6	53436363	142	Intergenic
IM-MY21	LjG1.1_chr6	62128126	407	Exon	LotjaGi6g1v0303800	Prolyl 4-hydroxylase subunit alpha-like protein
IM-N10	LjG1.1_chr2	75214063	4	Exon	LotjaGi2g1v0280400	BRO1 domain-containing protein
IM-N10	LjG1.1_chr1	18146390	389	Endogenous LORE1
IM-N10	LjG1.1_chr1	93087431	479	Endogenous LORE1
IM-N10	LjG1.1_chr2	3995309	575	Endogenous LORE1
IM-N10	LjG1.1_chr2	7736567	446	Endogenous LORE1
IM-N10	LjG1.1_chr4	66568326	22	Endogenous LORE1
IM-N10	LjG1.1_chr4	80380544	138	Endogenous LORE1
IM-N10	LjG1.1_chr1	129947748	7	Intergenic
IM-N10	LjG1.1_chr6	64916240	594	Endogenous LORE1
IM-N10	LjG1.1_chr6	65769153	520	Endogenous LORE1
IM-N12	LjG1.1_chr1	19797457	4	Exon	LotjaGi1g1v0125400	Ribonuclease E/G family protein
IM-N12	LjG1.1_chr1	18146390	101	Endogenous LORE1
IM-N12	LjG1.1_chr1	93087431	36	Endogenous LORE1
IM-N12	LjG1.1_chr2	3995309	62	Endogenous LORE1
IM-N12	LjG1.1_chr2	7736567	100	Endogenous LORE1
IM-N12	LjG1.1_chr2	69977699	133	Endogenous LORE1
IM-N12	LjG1.1_chr2	75214063	22	Endogenous LORE1
IM-N12	LjG1.1_chr4	80380544	36	Endogenous LORE1
IM-N12	LjG1.1_chr2	7752855	13	Intergenic
IM-N12	LjG1.1_chr5	4092403	4	Intergenic
IM-N12	LjG1.1_chr4	80873997	37	Endogenous LORE1
IM-N12	LjG1.1_chr6	64916240	100	Endogenous LORE1
IM-N12	LjG1.1_chr6	65769153	33	Endogenous LORE1
IM-N4	LjG1.1_chr1	133181184	9	UTR	LotjaGi1g1v0758400_LC	Regulator of chromosome condensation (RCC1)
IM-N4	LjG1.1_chr2	72767929	6	Exon	LotjaGi2g1v0259700	Starch synthase
IM-N4	LjG1.1_chr1	18146390	30	Endogenous LORE1
IM-N4	LjG1.1_chr1	93087431	65	Endogenous LORE1
IM-N4	LjG1.1_chr2	3995309	66	Endogenous LORE1
IM-N4	LjG1.1_chr2	7736567	60	Endogenous LORE1
IM-N4	LjG1.1_chr2	69977699	83	Endogenous LORE1
IM-N4	LjG1.1_chr2	75214063	32	Endogenous LORE1
IM-N4	LjG1.1_chr4	80380544	50	Endogenous LORE1
IM-N4	LjG1.1_chr1	91097892	4	Intergenic
IM-N4	LjG1.1_chr4	80873997	23	Endogenous LORE1
IM-N4	LjG1.1_chr5	4092403	4	Intergenic
IM-N4	LjG1.1_chr6	64916240	91	Endogenous LORE1
IM-N4	LjG1.1_chr6	65769153	71	Endogenous LORE1
IM-N4	LjG1.1_chr2	90471961	5	Intron	LotjaGi2g1v0407500_LC	Cytosolic Fe-S cluster assembly factor NAR1
IM-N4	LjG1.1_chr3	92911417	6	Exon	LotjaGi3g1v0512000	Har1
IM-N4	LjG1.1_chr4	13313124	4	Intron	LotjaGi4g1v0098500	Protein FRIGIDA
IM-N4	LjG1.1_chr6	8368183	6	Intron	LotjaGi6g1v0044400	Eukaryotic translation initiation factor 2 subunit
IM-N4	LjG1.1_chr6	42609645	9	Exon	LotjaGi6g1v0150100_LC	disease resistance family protein
IM-N6	LjG1.1_chr3	68164104	8	Exon	LotjaGi3g1v0321000	Pentatricopeptide repeat-containing protein
IM-N6	LjG1.1_chr3	68168242	9	UTR	LotjaGi3g1v0321100_LC	Phosphoenolpyruvate carboxylase
IM-N6	LjG1.1_chr1	93087431	26	Endogenous LORE1
IM-N6	LjG1.1_chr2	3995309	31	Endogenous LORE1
IM-N6	LjG1.1_chr2	7736567	27	Endogenous LORE1
IM-N6	LjG1.1_chr2	69977699	38	Endogenous LORE1
IM-N6	LjG1.1_chr2	75214063	13	Endogenous LORE1
IM-N6	LjG1.1_chr4	80380544	22	Endogenous LORE1
IM-N6	LjG1.1_chr4	80873997	5	Endogenous LORE1
IM-N6	LjG1.1_chr6	64916240	33	Endogenous LORE1
IM-N6	LjG1.1_chr6	65769153	19	Endogenous LORE1
IM-N7	LjG1.1_chr3	29629905	7	UTR	LotjaGi3g1v0202800	E3 ubiquitin-protein ligase
IM-N7	LjG1.1_chr3	62458656	5	UTR	LotjaGi3g1v0299400	Purple acid phosphatase
IM-N7	LjG1.1_chr3	88991144	15	Intron	LotjaGi3g1v0472700	5'-3' exoribonuclease 3
IM-N7	LjG1.1_chr3	89026534	4	Exon	LotjaGi3g1v0473300	Protein FAM210B-like protein
IM-N7	LjG1.1_chr4	71993962	30	Exon	LotjaGi4g1v0340200	Pentatricopeptide repeat-containing protein
IM-N7	LjG1.1_chr5	49858598	13	Intron	LotjaGi5g1v0200100	UDP-N-acetylglucosamine--peptide
IM-N7	LjG1.1_chr1	18146390	30	Endogenous LORE1
IM-N7	LjG1.1_chr1	93087431	9	Endogenous LORE1
IM-N7	LjG1.1_chr2	3995309	58	Endogenous LORE1
IM-N7	LjG1.1_chr2	7736567	59	Endogenous LORE1
IM-N7	LjG1.1_chr2	50895616	7	Intergenic
IM-N7	LjG1.1_chr2	69977699	39	Endogenous LORE1
IM-N7	LjG1.1_chr2	75214063	8	Endogenous LORE1
IM-N7	LjG1.1_chr4	80380544	13	Endogenous LORE1
IM-N7	LjG1.1_chr4	80873997	16	Endogenous LORE1
IM-N7	LjG1.1_chr6	47326777	9	Intron	LotjaGi6g1v0181200	Squalene monooxygenase
IM-N7	LjG1.1_chr6	64916240	63	Endogenous LORE1
IM-N7	LjG1.1_chr6	65769153	23	Endogenous LORE1
IM-O19	LjG1.1_chr2	72767929	8	Exon	LotjaGi2g1v0259700	Starch synthase
IM-O19	LjG1.1_chr2	74672064	5	Exon	LotjaGi2g1v0274900	Zinc finger protein
IM-O19	LjG1.1_chr2	82070590	4	Exon	LotjaGi2g1v0343300	CYCLOPS
IM-O19	LjG1.1_chr1	18146390	57	Endogenous LORE1
IM-O19	LjG1.1_chr1	93087431	142	Endogenous LORE1
IM-O19	LjG1.1_chr2	3995309	133	Endogenous LORE1
IM-O19	LjG1.1_chr2	7736567	109	Endogenous LORE1
IM-O19	LjG1.1_chr2	69977699	138	Endogenous LORE1
IM-O19	LjG1.1_chr2	75214063	53	Endogenous LORE1
IM-O19	LjG1.1_chr4	66568326	7	Endogenous LORE1
IM-O19	LjG1.1_chr4	80380544	87	Endogenous LORE1
IM-O19	LjG1.1_chr4	80873997	68	Endogenous LORE1
IM-O19	LjG1.1_chr1	91097892	7	Intergenic
IM-O19	LjG1.1_chr1	113864726	5	Intergenic
IM-O19	LjG1.1_chr2	90471961	9	Intron	LotjaGi2g1v0407500_LC	Cytosolic Fe-S cluster assembly factor NAR1
IM-O19	LjG1.1_chr3	90756903	4	Intergenic
IM-O19	LjG1.1_chr4	52081008	5	Intergenic
IM-O19	LjG1.1_chr5	4092403	10	Intergenic
IM-O19	LjG1.1_chr5	61369719	11	Intergenic
IM-O19	LjG1.1_chr6	53436363	4	Intergenic
IM-O19	LjG1.1_chr6	62128126	4	Exon	LotjaGi6g1v0303800	Prolyl 4-hydroxylase subunit alpha-like protein
IM-O19	LjG1.1_chr6	64916240	160	Endogenous LORE1
IM-O19	LjG1.1_chr6	65769153	141	Endogenous LORE1
IM-O19	LjG1.1_chr3	53305926	5	Exon	LotjaGi3g1v0273500	RHO guanyl-nucleotide exchange factor
IM-O19	LjG1.1_chr3	92911417	4	Exon	LotjaGi3g1v0512000	Har1
IM-O19	LjG1.1_chr5	3663187	8	Intron	LotjaGi5g1v0018900	Leishmanolysin-like peptidase
IM-O19	LjG1.1_chr6	42609645	9	Exon	LotjaGi6g1v0150100_LC	disease resistance family protein
IM-O19	LjG1.1_chr6	47603340	5	Exon	LotjaGi6g1v0183200	Cellulose synthase
IM-O24	LjG1.1_chr1	18146390	37	Endogenous LORE1
IM-O24	LjG1.1_chr1	93087431	29	Endogenous LORE1
IM-O24	LjG1.1_chr2	3995309	93	Endogenous LORE1
IM-O24	LjG1.1_chr2	7736567	92	Endogenous LORE1
IM-O24	LjG1.1_chr2	69977699	188	Endogenous LORE1
IM-O24	LjG1.1_chr2	75214063	7	Endogenous LORE1
IM-O24	LjG1.1_chr4	66568326	5	Endogenous LORE1
IM-O24	LjG1.1_chr4	80380544	41	Endogenous LORE1
IM-O24	LjG1.1_chr4	80873997	30	Endogenous LORE1
IM-O24	LjG1.1_chr6	64916240	114	Endogenous LORE1
IM-O24	LjG1.1_chr6	65769153	133	Endogenous LORE1
IM-O26	LjG1.1_chr1	93087431	70	Endogenous LORE1
IM-O26	LjG1.1_chr2	3995309	102	Endogenous LORE1
IM-O26	LjG1.1_chr2	7736567	216	Endogenous LORE1
IM-O26	LjG1.1_chr2	69977699	217	Endogenous LORE1
IM-O26	LjG1.1_chr3	75072625	5	Intergenic
IM-O26	LjG1.1_chr4	80380544	56	Endogenous LORE1
IM-O26	LjG1.1_chr4	80873997	68	Endogenous LORE1
IM-O26	LjG1.1_chr6	64916240	30	Endogenous LORE1
IM-O26	LjG1.1_chr6	65769153	43	Endogenous LORE1
IM-O33	LjG1.1_chr1	18146390	67	Endogenous LORE1
IM-O33	LjG1.1_chr1	93087431	117	Endogenous LORE1
IM-O33	LjG1.1_chr2	3995309	102	Endogenous LORE1
IM-O33	LjG1.1_chr2	7736567	189	Endogenous LORE1
IM-O33	LjG1.1_chr2	69977699	248	Endogenous LORE1
IM-O33	LjG1.1_chr2	75214063	50	Endogenous LORE1
IM-O33	LjG1.1_chr4	80380544	61	Endogenous LORE1
IM-O33	LjG1.1_chr4	80873997	62	Endogenous LORE1
IM-O33	LjG1.1_chr6	64916240	48	Endogenous LORE1
IM-O33	LjG1.1_chr6	65769153	101	Endogenous LORE1
IM-O4	LjG1.1_chr1	81346150	27	UTR	LotjaGi1g1v0346300	LINE-1 reverse transcriptase like
IM-O4	LjG1.1_chr2	12156058	69	Intron	LotjaGi2g1v0058300	Laminin subunit gamma-1
IM-O4	LjG1.1_chr2	51747974	47	Intron	LotjaGi2g1v0142100_LC	Guanine nucleotide-binding protein subunit beta-like protein
IM-O4	LjG1.1_chr1	18146390	221	Endogenous LORE1
IM-O4	LjG1.1_chr1	93087431	203	Endogenous LORE1
IM-O4	LjG1.1_chr2	3995309	63	Endogenous LORE1
IM-O4	LjG1.1_chr2	7736567	1099	Endogenous LORE1
IM-O4	LjG1.1_chr2	69977699	147	Endogenous LORE1
IM-O4	LjG1.1_chr2	75214063	6	Endogenous LORE1
IM-O4	LjG1.1_chr4	80380544	173	Endogenous LORE1
IM-O4	LjG1.1_chr6	64916240	444	Endogenous LORE1
IM-O4	LjG1.1_chr3	83389295	11	Intergenic
IM-O4	LjG1.1_chr6	65769153	22	Endogenous LORE1
IM-O4	LjG1.1_chr6	50952709	46	Exon	LotjaGi6g1v0212100	inositol transporter 2
IM-O7	LjG1.1_chr2	12156058	13	Intron	LotjaGi2g1v0058300	Laminin subunit gamma-1
IM-O7	LjG1.1_chr1	18146390	89	Endogenous LORE1
IM-O7	LjG1.1_chr1	93087431	187	Endogenous LORE1
IM-O7	LjG1.1_chr2	3995309	73	Endogenous LORE1
IM-O7	LjG1.1_chr2	7736567	633	Endogenous LORE1
IM-O7	LjG1.1_chr2	69977699	550	Endogenous LORE1
IM-O7	LjG1.1_chr2	75214063	69	Endogenous LORE1
IM-O7	LjG1.1_chr4	80380544	114	Endogenous LORE1
IM-O7	LjG1.1_chr4	80873997	5	Endogenous LORE1
IM-O7	LjG1.1_chr6	64916240	195	Endogenous LORE1
IM-O7	LjG1.1_chr6	65769153	58	Endogenous LORE1
IM-S15	LjG1.1_chr1	103880718	58	Intron	LotjaGi1g1v0516200	50S ribosomal protein L24
IM-S15	LjG1.1_chr1	103947308	255	Exon	LotjaGi1g1v0516700	COBRA-like protein
IM-S15	LjG1.1_chr1	136240887	11	Intron	LotjaGi1g1v0790600_LC	UPF0183 protein
IM-S15	LjG1.1_chr2	6336225	46	Intron	LotjaGi2g1v0018200	S-acyltransferase
IM-S15	LjG1.1_chr2	68303856	96	Exon	LotjaGi2g1v0225900	Glutamate carboxypeptidase 2
IM-S15	LjG1.1_chr2	77271037	147	Intron	LotjaGi2g1v0298200	T-box transcription factor, putative (DUF863)
IM-S15	LjG1.1_chr3	63768418	11	Intron	LotjaGi3g1v0304300	Integral membrane family protein
IM-S15	LjG1.1_chr3	72767328	76	Exon	LotjaGi3g1v0349800	WRKY transcription factor
IM-S15	LjG1.1_chr3	94145607	10	Exon	LotjaGi3g1v0524500	Receptor-like kinase
IM-S15	LjG1.1_chr4	7717241	13	UTR	LotjaGi4g1v0062500	Cellulose synthase
IM-S15	LjG1.1_chr1	18146390	107	Endogenous LORE1
IM-S15	LjG1.1_chr1	93087431	61	Endogenous LORE1
IM-S15	LjG1.1_chr1	127353509	11	Intergenic
IM-S15	LjG1.1_chr2	3995309	99	Endogenous LORE1
IM-S15	LjG1.1_chr2	7736567	410	Endogenous LORE1
IM-S15	LjG1.1_chr2	69977699	311	Endogenous LORE1
IM-S15	LjG1.1_chr2	75214063	57	Endogenous LORE1
IM-S15	LjG1.1_chr6	53974415	18	Intron	LotjaGi6g1v0231100_LC	Ulp1 protease family
IM-S15	LjG1.1_chr3	60233909	8	Intergenic
IM-S15	LjG1.1_chr4	35982315	8	Intergenic
IM-S15	LjG1.1_chr4	66568326	8	Endogenous LORE1
IM-S15	LjG1.1_chr4	76451914	17	Intergenic
IM-S15	LjG1.1_chr4	80380544	135	Endogenous LORE1
IM-S15	LjG1.1_chr5	13533574	137	Intergenic
IM-S15	LjG1.1_chr6	64916240	95	Endogenous LORE1
IM-S15	LjG1.1_chr6	65769153	119	Endogenous LORE1
IM-S15	LjG1.1_chr6	64922775	84	Intron	LotjaGi6g1v0334700	Wings apart-like protein
IM-S18	LjG1.1_chr1	3289362	5	Intron	LotjaGi1g1v0027100	Rab3 GTPase-activating protein
IM-S18	LjG1.1_chr1	93731312	4	Exon	LotjaGi1g1v0441000	GDSL esterase/lipase family
IM-S18	LjG1.1_chr2	59199257	13	Exon	LotjaGi2g1v0174200	CDT1-like protein
IM-S18	LjG1.1_chr5	3544701	9	Exon	LotjaGi5g1v0018200	Acyltransferase, putative
IM-S18	LjG1.1_chr1	93087431	25	Endogenous LORE1
IM-S18	LjG1.1_chr2	3995309	16	Endogenous LORE1
IM-S18	LjG1.1_chr2	7736567	51	Endogenous LORE1
IM-S18	LjG1.1_chr2	69977699	53	Endogenous LORE1
IM-S18	LjG1.1_chr2	75214063	18	Endogenous LORE1
IM-S18	LjG1.1_chr4	80380544	12	Endogenous LORE1
IM-S18	LjG1.1_chr4	80873997	7	Endogenous LORE1
IM-S18	LjG1.1_chr6	64916240	39	Endogenous LORE1
IM-S18	LjG1.1_chr6	65769153	22	Endogenous LORE1
IM-S23	LjG1.1_chr1	12234025	4	Intron	LotjaGi1g1v0084800	Subtilisin-like serine protease
IM-S23	LjG1.1_chr1	33756024	8	Promoter	LotjaGi1g1v0176000	Phosphoenolpyruvate carboxykinase
IM-S23	LjG1.1_chr1	49599290	4	Intron	LotjaGi1g1v0222600	Endoribonuclease YbeY
IM-S23	LjG1.1_chr1	133181184	11	UTR	LotjaGi1g1v0758400_LC	Regulator of chromosome condensation (RCC1)
IM-S23	LjG1.1_chr2	7693208	4	Promoter	LotjaGi2g1v0021500	DUF241 domain protein
IM-S23	LjG1.1_chr2	74672064	4	Exon	LotjaGi2g1v0274900	Zinc finger protein
IM-S23	LjG1.1_chr2	82070590	4	Exon	LotjaGi2g1v0343300	CYCLOPS
IM-S23	LjG1.1_chr2	87485316	6	Exon	LotjaGi2g1v0377600	Peptide methionine sulfoxide reductase msrB
IM-S23	LjG1.1_chr2	90471961	20	Intron	LotjaGi2g1v0407500_LC	NDX1 homeobox protein
IM-S23	LjG1.1_chr3	92911417	19	Exon	LotjaGi3g1v0512000	Har1
IM-S23	LjG1.1_chr4	2680451	9	Exon	LotjaGi4g1v0022000	Chromodomain-helicase-DNA-binding family protein
IM-S23	LjG1.1_chr4	50883978	7	Intron	LotjaGi4g1v0216300	gamma-irradiation and mitomycin c induced
IM-S23	LjG1.1_chr1	18146390	98	Endogenous LORE1
IM-S23	LjG1.1_chr1	93087431	145	Endogenous LORE1
IM-S23	LjG1.1_chr1	113864726	6	Intergenic
IM-S23	LjG1.1_chr2	3995309	126	Endogenous LORE1
IM-S23	LjG1.1_chr2	7736567	86	Endogenous LORE1
IM-S23	LjG1.1_chr2	69977699	126	Endogenous LORE1
IM-S23	LjG1.1_chr2	75214063	55	Endogenous LORE1
IM-S23	LjG1.1_chr2	75274391	9	Intergenic
IM-S23	LjG1.1_chr3	85406645	4	Intergenic
IM-S23	LjG1.1_chr4	52081008	6	Intergenic
IM-S23	LjG1.1_chr4	66568326	7	Endogenous LORE1
IM-S23	LjG1.1_chr4	80380544	113	Endogenous LORE1
IM-S23	LjG1.1_chr4	80873997	68	Endogenous LORE1
IM-S23	LjG1.1_chr5	4092403	4	Intergenic
IM-S23	LjG1.1_chr5	61369719	4	Intergenic
IM-S23	LjG1.1_chr6	64916240	136	Endogenous LORE1
IM-S23	LjG1.1_chr6	65769153	121	Endogenous LORE1
IM-S23	LjG1.1_chr5	64924666	4	Intron	LotjaGi5g1v0332200	Tetratricopeptide repeat protein 5
IM-S23	LjG1.1_chr6	8368183	5	Intron	LotjaGi6g1v0044400	Eukaryotic translation initiation factor 2 subunit
IM-S23	LjG1.1_chr6	42609645	5	Exon	LotjaGi6g1v0150100_LC	disease resistance family protein
IM-S23	LjG1.1_chr6	62128126	7	Exon	LotjaGi6g1v0303800	Prolyl 4-hydroxylase subunit alpha-like protein
IM-S30	LjG1.1_chr1	60238556	20	Intron	LotjaGi1g1v0251000_LC	SET domain-containing protein
IM-S30	LjG1.1_chr2	82187692	6	UTR	LotjaGi2g1v0344800	ATP-dependent RNA helicase DeaD
IM-S30	LjG1.1_chr1	18146390	16	Endogenous LORE1
IM-S30	LjG1.1_chr1	93087431	9	Endogenous LORE1
IM-S30	LjG1.1_chr2	3995309	11	Endogenous LORE1
IM-S30	LjG1.1_chr2	7736567	17	Endogenous LORE1
IM-S30	LjG1.1_chr2	69977699	17	Endogenous LORE1
IM-S30	LjG1.1_chr4	80380544	7	Endogenous LORE1
IM-S30	LjG1.1_chr4	80873997	6	Endogenous LORE1
IM-S30	LjG1.1_chr6	64916240	24	Endogenous LORE1
IM-S30	LjG1.1_chr6	65769153	9	Endogenous LORE1
IM-S30	LjG1.1_chr5	22730594	4	Intron	LotjaGi5g1v0113800	Serine/arginine rich splicing factor
IM-S34	LjG1.1_chr2	75040212	13	UTR	LotjaGi2g1v0278900	Serine/threonine protein phosphatase 2A
IM-S34	LjG1.1_chr2	75214063	4	Exon	LotjaGi2g1v0280400	BRO1 domain-containing protein
IM-S34	LjG1.1_chr2	75266107	11	Exon	LotjaGi2g1v0280800	Allene oxide cyclase
IM-S34	LjG1.1_chr2	89683183	4	Intron	LotjaGi2g1v0399600	Transmembrane protein 131-like
IM-S34	LjG1.1_chr2	93559216	9	UTR	LotjaGi2g1v0438600	Replication factor-A carboxy-terminal domain protein
IM-S34	LjG1.1_chr1	18146390	13	Endogenous LORE1
IM-S34	LjG1.1_chr1	93087431	40	Endogenous LORE1
IM-S34	LjG1.1_chr2	3995309	19	Endogenous LORE1
IM-S34	LjG1.1_chr2	7736567	51	Endogenous LORE1
IM-S34	LjG1.1_chr2	69977699	35	Endogenous LORE1
IM-S34	LjG1.1_chr4	80380544	18	Endogenous LORE1
IM-S34	LjG1.1_chr6	64916240	8	Endogenous LORE1
IM-S34	LjG1.1_chr3	79569524	9	Intron	LotjaGi3g1v0395800_LC	Calcineurin B, putative
IM-S34	LjG1.1_chr6	65769153	11	Endogenous LORE1
IM-S34	LjG1.1_chr4	80873997	4	Exon	LotjaGi4g1v0435400	50S ribosomal protein L14
IM-S34	LjG1.1_chr5	3810454	6	UTR	LotjaGi5g1v0020500_LC	multidrug resistance-associated protein 1
IM-S34	LjG1.1_chr5	45746013	13	UTR	LotjaGi5g1v0179800	Autophagy-related protein 9
IM-S50	LjG1.1_chr5	23542140	4	Intron	LotjaGi5g1v0115400	ATP dependent RNA helicase
IM-S50	LjG1.1_chr1	18146390	10	Endogenous LORE1
IM-S50	LjG1.1_chr1	93087431	15	Endogenous LORE1
IM-S50	LjG1.1_chr2	3995309	17	Endogenous LORE1
IM-S50	LjG1.1_chr2	7736567	9	Endogenous LORE1
IM-S50	LjG1.1_chr2	69977699	8	Endogenous LORE1
IM-S50	LjG1.1_chr4	80380544	4	Endogenous LORE1
IM-S50	LjG1.1_chr4	80873997	13	Endogenous LORE1
IM-S50	LjG1.1_chr6	64916240	8	Endogenous LORE1
IM-S50	LjG1.1_chr6	65769153	10	Endogenous LORE1

## Sheet: Endogenous
		Chromosome 1		Chromosome 2				Chromosome 4			Chromosome 6
	Position:	18146390	93087431	3995309	7736567	69977699	75214063	66568326	80380544	80873997	64916240	65769153
Mutant ID	IM-116
	IM-118
	IM-25
	IM-53
	IM-56
	IM-58
	IM-59
	IM-8
	IM-A116
	IM-A19
	IM-A20
	IM-A39
	IM-A55
	IM-A60
	IM-A68
	IM-D11
	IM-D14
	IM-D19
	IM-D24
	IM-D25
	IM-D26
	IM-D30
	IM-D34
	IM-D08
	IM-D09
	IM-N10
	IM-N12
	IM-N04
	IM-O19
	IM-O24
	IM-O33
	IM-O4
	IM-O7
	IM-S30
	IM-S34
	IM-21
	IM-D21
	IM-D22
	IM-D18
	IM-S23
	IM-N06
	IM-S18
	IM-N07
	IM-S15
	IM-O26
	IM-S50
	IM-MY21
	Presence of endogenous LORE1

## Sheet: Novel
Mutant line	Chromosome	Position	Reads	Location	Gene ID	Gene function
IM-25	LjG1.1_chr2	69977700	4	Intergenic
IM-56	LjG1.1_chr1	44153276	4	Intergenic
IM-8	LjG1.1_chr2	46676659	7	Exon	LotjaGi2g1v0127100	S-acyltransferase
IM-8	LjG1.1_chr3	92911417	6	Exon	LotjaGi3g1v0512000	Receptor-like kinase
IM-A19	LjG1.1_chr5	16307751	10	Intergenic
IM-A55	LjG1.1_chr1	119612095	4	UTR	LotjaGi1g1v0639600	Ricin B lectin domain-containing protein
IM-A55	LjG1.1_chr1	133181184	4	UTR	LotjaGi1g1v0758400_LC	Regulator of chromosome condensation (RCC1)
IM-A55	LjG1.1_chr4	80752406	24	Intron	LotjaGi4g1v0433200	Trichome birefringence-like protein
IM-A60	LjG1.1_chr2	7286693	14	Intergenic
IM-A60	LjG1.1_chr2	12510352	11	Intergenic
IM-A60	LjG1.1_chr2	34779240	7	Intergenic
IM-A60	LjG1.1_chr6	37002219	10	Intergenic
IM-A60	LjG1.1_chr6	6000551	4	Intergenic
IM-A60	LjG1.1_chr2	12156058	10	Intron	LotjaGi2g1v0058300	Laminin subunit gamma-1
IM-A68	LjG1.1_chr5	30584147	4	Intergenic
IM-A68	LjG1.1_chr2	46676659	5	Exon	LotjaGi2g1v0127100	S-acyltransferase
IM-A68	LjG1.1_chr2	90471961	7	Intron	LotjaGi2g1v0407500_LC	Cytosolic Fe-S cluster assembly factor NAR1
IM-A68	LjG1.1_chr3	92911417	5	Exon	LotjaGi3g1v0512000	Receptor-like kinase
IM-A68	LjG1.1_chr4	2680451	6	Exon	LotjaGi4g1v0022000	Chromodomain-helicase-DNA-binding
IM-A68	LjG1.1_chr6	62128126	7	Exon	LotjaGi6g1v0303800	Prolyl 4-hydroxylase subunit alpha-like protein
IM-D11	LjG1.1_chr1	37252915	5	Intron	LotjaGi1g1v0189800	Dentin sialophosphoprotein-like protein
IM-D18	LjG1.1_chr2	26484287	8	Intron	LotjaGi2g1v0090100	Cleavage stimulation factor subunit
IM-D18	LjG1.1_chr2	43588417	12	Intron	LotjaGi2g1v0119300	Protein kinase family protein
IM-D18	LjG1.1_chr2	85543449	12	Intron	LotjaGi2g1v0347900	Late embryogenesis abundant (LEA)hydroxyproline-rich glycoprotein
IM-D18	LjG1.1_chr2	86599068	5	Intron	LotjaGi2g1v0368500	NDX1 homeobox protein
IM-D18	LjG1.1_chr2	87485316	57	Exon	LotjaGi2g1v0377600	Peptide methionine sulfoxide reductase msrB
IM-D18	LjG1.1_chr2	90471961	177	Intron	LotjaGi2g1v0407500_LC	Cytosolic Fe-S cluster assembly factor NAR1
IM-D18	LjG1.1_chr3	5520270	41	Promoter	LotjaGi3g1v0052700	heat-inducible transcription repressor
IM-D18	LjG1.1_chr3	53305926	81	Exon	LotjaGi3g1v0273500	RHO guanyl-nucleotide exchange factor
IM-D18	LjG1.1_chr3	93834698	34	Exon	LotjaGi3g1v0521600	Amino acid permease
IM-D18	LjG1.1_chr3	97531106	6	Intron	LotjaGi3g1v0557400_LC	DEAD-box ATP-dependent RNA helicase
IM-D18	LjG1.1_chr1	26198337	4	Intergenic
IM-D18	LjG1.1_chr3	90756903	18	Intergenic
IM-D18	LjG1.1_chr5	61369719	82	Intergenic
IM-D18	LjG1.1_chr5	3663187	65	Intron	LotjaGi5g1v0018900	Leishmanolysin-like peptidase
IM-D18	LjG1.1_chr6	8368183	67	Intron	LotjaGi6g1v0044400	Eukaryotic translation initiation factor 2 subunit
IM-D21	LjG1.1_chr2	80642430	55	Intron	LotjaGi2g1v0330800	Endoribonuclease E-like protein
IM-D21	LjG1.1_chr1	113864726	184	Intergenic
IM-D21	LjG1.1_chr4	52081008	64	Intergenic
IM-D21	LjG1.1_chr6	3776424	34	Intergenic
IM-D21	LjG1.1_chr4	2680451	202	Exon	LotjaGi4g1v0022000	Chromodomain-helicase-DNA-binding family protein
IM-D21	LjG1.1_chr4	13313124	57	Intron	LotjaGi4g1v0098500	Protein FRIGIDA
IM-D21	LjG1.1_chr4	59015450	115	Exon	LotjaGi4g1v0241900	Nuclear mitotic apparatus 1
IM-D21	LjG1.1_chr5	48616325	115	UTR	LotjaGi5g1v0192700	Ion channel pollux-like protein
IM-D22	LjG1.1_chr1	18730968	31	UTR	LotjaGi1g1v0118700_LC	putative disease resistance protein RGA3
IM-D22	LjG1.1_chr2	74672064	73	Exon	LotjaGi2g1v0274900	Zinc finger protein
IM-D22	LjG1.1_chr2	82070590	64	Exon	LotjaGi2g1v0343300	CYCLOPS
IM-D22	LjG1.1_chr2	75274391	62	Intergenic
IM-D22	LjG1.1_chr3	16283242	5	Intergenic
IM-D22	LjG1.1_chr4	52081008	4	Intergenic
IM-D22	LjG1.1_chr6	21709050	55	Intergenic
IM-D22	LjG1.1_chr4	2680451	4	Exon	LotjaGi4g1v0022000	Chromodomain-helicase-DNA-binding family protein
IM-D22	LjG1.1_chr6	65865154	26	Intergenic
IM-D22	LjG1.1_chr5	47301225	50	UTR	LotjaGi5g1v0186200	Sieve element occlusion protein
IM-D22	LjG1.1_chr5	48616325	4	UTR	LotjaGi5g1v0192700	Ion channel pollux-like protein
IM-D22	LjG1.1_chr6	47603340	90	Exon	LotjaGi6g1v0183200	Cellulose synthase
IM-D22	LjG1.1_chr6	56500638	24	Exon	LotjaGi6g1v0252600	Pectin lyase-like superfamily protein
IM-D24	LjG1.1_chr1	458177	24	Intron	LotjaGi1g1v0001400	Niemann-Pick C1 protein
IM-D24	LjG1.1_chr4	66568326	4	Intergenic
IM-D24	LjG1.1_chr2	82442447	38	UTR	LotjaGi2g1v0347900	Late embryogenesis abundant (LEA)hydroxyproline-rich glycoprotein
IM-D24	LjG1.1_chr3	85406645	26	UTR	LotjaGi3g1v0441300	H/ACA ribonucleoprotein complex non-core subunit NAF1
IM-D24	LjG1.1_chr4	54821094	13	Exon	LotjaGi4g1v0234300_LC	Poly [ADP]-ribose] polymerase
IM-D24	LjG1.1_chr5	67923998	16	UTR	LotjaGi5g1v0364000	Eukaryotic translation initiation factor 3
IM-D24	LjG1.1_chr6	42609645	156	UTR	LotjaGi6g1v0150100_LC	disease resistance family protein / LRR family protein
IM-D24	LjG1.1_chr6	63466952	27	Exon	LotjaGi6g1v0317000	Aquaporin
IM-D25	LjG1.1_chr1	91097892	38	Intergenic
IM-D25	LjG1.1_chr5	4092403	13	Intergenic
IM-D25	LjG1.1_chr2	72767929	10	Exon	LotjaGi2g1v0259700	Starch synthase
IM-D25	LjG1.1_chr4	12017306	6	Intron	LotjaGi4g1v0090700	myb-like protein
IM-D26	LjG1.1_chr3	88951812	6	Intergenic
IM-D30	LjG1.1_chr3	25669380	6	Intergenic
IM-D30	LjG1.1_chr5	4092403	4	Intergenic
IM-D30	LjG1.1_chr2	72767929	6	Exon	LotjaGi2g1v0259700	Starch synthase
IM-D30	LjG1.1_chr2	75554089	8	Intron	LotjaGi2g1v0283100	SOSS complex subunit B like
IM-D30	LjG1.1_chr2	92887255	23	Intron	LotjaGi2g1v0431900	Generative cell specific-1
IM-D30	LjG1.1_chr3	66783772	14	Intron	LotjaGi3g1v0315400	Dentin sialophosphoprotein-related
IM-D30	LjG1.1_chr4	12017306	6	Intron	LotjaGi4g1v0090700	myb-like protein
IM-D30	LjG1.1_chr4	28550673	19	UTR	LotjaGi4g1v0160100	Very-long-chain (3R)-3-hydroxyacyl-CoA dehydratase
IM-D34	LjG1.1_chr1	18730968	9	UTR	LotjaGi1g1v0118700_LC	putative disease resistance protein RGA3
IM-D34	LjG1.1_chr1	91097892	10	Intergenic
IM-D34	LjG1.1_chr1	113864726	29	Intergenic
IM-D34	LjG1.1_chr2	43588417	4	Intron	LotjaGi2g1v0119300	Protein kinase family protein
IM-D34	LjG1.1_chr2	75274391	20	Intergenic
IM-D34	LjG1.1_chr3	88951812	4	Intergenic
IM-D34	LjG1.1_chr3	90756903	11	Intergenic
IM-D34	LjG1.1_chr2	72767929	14	Exon	LotjaGi2g1v0259700	Starch synthase
IM-D34	LjG1.1_chr2	74672064	12	Exon	LotjaGi2g1v0274900	Zinc finger protein
IM-D34	LjG1.1_chr4	52081008	13	Intergenic
IM-D34	LjG1.1_chr5	4092403	19	Intergenic
IM-D34	LjG1.1_chr5	61369719	19	Intergenic
IM-D34	LjG1.1_chr6	21709050	11	Intergenic
IM-D34	LjG1.1_chr6	65865154	6	Intergenic
IM-D34	LjG1.1_chr2	80642430	17	Intron	LotjaGi2g1v0330800	Endoribonuclease E-like protein
IM-D34	LjG1.1_chr2	82070590	15	Exon	LotjaGi2g1v0343300	CYCLOPS
IM-D34	LjG1.1_chr2	87485316	13	Exon	LotjaGi2g1v0377600	Peptide methionine sulfoxide reductase msrB
IM-D34	LjG1.1_chr2	90471961	53	Intron	LotjaGi2g1v0407500_LC	Cytosolic Fe-S cluster assembly factor NAR1
IM-D34	LjG1.1_chr3	5520270	14	Promoter	LotjaGi3g1v0052700	heat-inducible transcription repressor
IM-D34	LjG1.1_chr3	53305926	13	Exon	LotjaGi3g1v0273500	RHO guanyl-nucleotide exchange factor
IM-D34	LjG1.1_chr3	92911417	6	Exon	LotjaGi3g1v0512000	Receptor-like kinase
IM-D34	LjG1.1_chr3	93834698	4	Exon	LotjaGi3g1v0521600	Amino acid permease
IM-D34	LjG1.1_chr3	97531106	6	Intron	LotjaGi3g1v0557400_LC	DEAD-box ATP-dependent RNA helicase
IM-D34	LjG1.1_chr4	2680451	22	Exon	LotjaGi4g1v0022000	Chromodomain-helicase-DNA-binding family protein
IM-D34	LjG1.1_chr4	12017306	14	Intron	LotjaGi4g1v0090700	myb-like protein
IM-D34	LjG1.1_chr4	13313124	13	Intron	LotjaGi4g1v0098500	Protein FRIGIDA
IM-D34	LjG1.1_chr4	59015450	8	Exon	LotjaGi4g1v0241900	Nuclear mitotic apparatus 1
IM-D34	LjG1.1_chr5	3663187	7	Intron	LotjaGi5g1v0018900	Leishmanolysin-like peptidase
IM-D34	LjG1.1_chr5	47301225	11	UTR	LotjaGi5g1v0186200	Sieve element occlusion protein
IM-D34	LjG1.1_chr5	48616325	9	UTR	LotjaGi5g1v0192700	Ion channel pollux-like protein
IM-D34	LjG1.1_chr6	8368183	15	Intron	LotjaGi6g1v0044400	Eukaryotic translation initiation factor 2 subunit
IM-D34	LjG1.1_chr6	42609645	20	Exon	LotjaGi6g1v0150100_LC	disease resistance family protein
IM-D34	LjG1.1_chr6	47603340	20	Exon	LotjaGi6g1v0183200	Cellulose synthase
IM-D34	LjG1.1_chr6	62128126	4	Exon	LotjaGi6g1v0303800	Prolyl 4-hydroxylase subunit alpha-like protein
IM-D8	LjG1.1_chr3	25669380	4	Intergenic
IM-D9	LjG1.1_chr4	66568326	4	Intergenic
IM-MY21	LjG1.1_chr1	80506185	189	Intron	LotjaGi1g1v0342700	Golgi-body localization protein domain isoform
IM-MY21	LjG1.1_chr1	133181184	335	UTR	LotjaGi1g1v0758400_LC	Regulator of chromosome condensation (RCC1)
IM-MY21	LjG1.1_chr2	26487328	184	Intron	LotjaGi2g1v0090100	Cleavage stimulation factor subunit
IM-MY21	LjG1.1_chr2	46676659	211	Exon	LotjaGi2g1v0127100	S-acyltransferase
IM-MY21	LjG1.1_chr3	88951812	165	Intergenic
IM-MY21	LjG1.1_chr3	92911417	270	Exon	LotjaGi3g1v0512000	Har1
IM-MY21	LjG1.1_chr6	53436363	142	Intron	LotjaGi6g1v0228400	Protein phosphatase 2c
IM-MY21	LjG1.1_chr6	62128126	407	Exon	LotjaGi6g1v0303800	Prolyl 4-hydroxylase subunit alpha-like protein
IM-N10	LjG1.1_chr2	75214063	4	Exon	LotjaGi2g1v0280400	BRO1 domain-containing protein
IM-N10	LjG1.1_chr1	129947748	7	Intergenic
IM-N12	LjG1.1_chr1	19797457	4	Exon	LotjaGi1g1v0125400	Ribonuclease E/G family protein
IM-N12	LjG1.1_chr2	7752855	13	Intergenic
IM-N12	LjG1.1_chr5	4092403	4	Intergenic
IM-N4	LjG1.1_chr1	133181184	9	UTR	LotjaGi1g1v0758400_LC	Regulator of chromosome condensation (RCC1)
IM-N4	LjG1.1_chr2	72767929	6	Exon	LotjaGi2g1v0259700	Starch synthase
IM-N4	LjG1.1_chr1	91097892	4	Intergenic
IM-N4	LjG1.1_chr5	4092403	4	Intergenic
IM-N4	LjG1.1_chr2	90471961	5	Intron	LotjaGi2g1v0407500_LC	Cytosolic Fe-S cluster assembly factor NAR1
IM-N4	LjG1.1_chr3	92911417	6	Exon	LotjaGi3g1v0512000	Receptor-like kinase
IM-N4	LjG1.1_chr4	13313124	4	Intron	LotjaGi4g1v0098500	Protein FRIGIDA
IM-N4	LjG1.1_chr6	8368183	6	Intron	LotjaGi6g1v0044400	Eukaryotic translation initiation factor 2 subunit
IM-N4	LjG1.1_chr6	42609645	9	Exon	LotjaGi6g1v0150100_LC	disease resistance family protein
IM-N6	LjG1.1_chr3	68164104	8	Exon	LotjaGi3g1v0321000	Pentatricopeptide repeat-containing protein
IM-N6	LjG1.1_chr3	68168242	9	UTR	LotjaGi3g1v0321100_LC	Phosphoenolpyruvate carboxylase
IM-N7	LjG1.1_chr3	29629905	7	UTR	LotjaGi3g1v0202800	E3 ubiquitin-protein ligase
IM-N7	LjG1.1_chr3	62458656	5	UTR	LotjaGi3g1v0299400	Purple acid phosphatase
IM-N7	LjG1.1_chr3	88991144	15	Intron	LotjaGi3g1v0472700	5'-3' exoribonuclease 3
IM-N7	LjG1.1_chr3	89026534	4	Exon	LotjaGi3g1v0473300	Protein FAM210B-like protein
IM-N7	LjG1.1_chr4	71993962	30	Exon	LotjaGi4g1v0340200	Pentatricopeptide repeat-containing protein
IM-N7	LjG1.1_chr5	49858598	13	Intron	LotjaGi5g1v0200100	UDP-N-acetylglucosamine--peptide
IM-N7	LjG1.1_chr2	50895616	7	Intergenic
IM-N7	LjG1.1_chr6	47326777	9	Intron	LotjaGi6g1v0181200	Squalene monooxygenase
IM-O19	LjG1.1_chr2	72767929	8	Exon	LotjaGi2g1v0259700	Starch synthase
IM-O19	LjG1.1_chr2	74672064	5	Exon	LotjaGi2g1v0274900	Zinc finger protein
IM-O19	LjG1.1_chr2	82070590	4	Exon	LotjaGi2g1v0343300	CYCLOPS
IM-O19	LjG1.1_chr1	91097892	7	Intergenic
IM-O19	LjG1.1_chr1	113864726	5	Intergenic
IM-O19	LjG1.1_chr2	90471961	9	Intron	LotjaGi2g1v0407500_LC	Cytosolic Fe-S cluster assembly factor NAR1
IM-O19	LjG1.1_chr3	90756903	4	Intergenic
IM-O19	LjG1.1_chr4	52081008	5	Intergenic
IM-O19	LjG1.1_chr5	4092403	10	Intergenic
IM-O19	LjG1.1_chr5	61369719	11	Intergenic
IM-O19	LjG1.1_chr6	53436363	4	Intergenic
IM-O19	LjG1.1_chr6	62128126	4	Intergenic
IM-O19	LjG1.1_chr3	53305926	5	Exon	LotjaGi3g1v0273500	RHO guanyl-nucleotide exchange factor
IM-O19	LjG1.1_chr3	92911417	4	Exon	LotjaGi3g1v0512000	Receptor-like kinase
IM-O19	LjG1.1_chr5	3663187	8	Intron	LotjaGi5g1v0018900	Leishmanolysin-like peptidase
IM-O19	LjG1.1_chr6	42609645	9	Exon	LotjaGi6g1v0150100_LC	disease resistance family protein
IM-O19	LjG1.1_chr6	47603340	5	Exon	LotjaGi6g1v0183200	Cellulose synthase
IM-O26	LjG1.1_chr3	75072625	5	Intergenic
IM-O4	LjG1.1_chr1	81346150	27	UTR	LotjaGi1g1v0346300	LINE-1 reverse transcriptase like
IM-O4	LjG1.1_chr2	12156058	69	Intron	LotjaGi2g1v0058300	Laminin subunit gamma-1
IM-O4	LjG1.1_chr2	51747974	47	Intron	LotjaGi2g1v0142100_LC	Guanine nucleotide-binding protein subunit beta-like protein
IM-O4	LjG1.1_chr3	83389295	11	Intergenic
IM-O4	LjG1.1_chr6	50952709	46	Exon	LotjaGi6g1v0212100	inositol transporter 2
IM-O7	LjG1.1_chr2	12156058	13	Intron	LotjaGi2g1v0058300	Laminin subunit gamma-1
IM-S15	LjG1.1_chr1	103880718	58	Intron	LotjaGi1g1v0516200	50S ribosomal protein L24
IM-S15	LjG1.1_chr1	103947308	255	Exon	LotjaGi1g1v0516700	COBRA-like protein
IM-S15	LjG1.1_chr1	136240887	11	Intron	LotjaGi1g1v0790600_LC	UPF0183 protein
IM-S15	LjG1.1_chr2	6336225	46	Intron	LotjaGi2g1v0018200	S-acyltransferase
IM-S15	LjG1.1_chr2	68303856	96	Exon	LotjaGi2g1v0225900	Glutamate carboxypeptidase 2
IM-S15	LjG1.1_chr2	77271037	147	Intron	LotjaGi2g1v0298200	T-box transcription factor, putative (DUF863)
IM-S15	LjG1.1_chr3	63768418	11	Intron	LotjaGi3g1v0304300	Integral membrane family protein
IM-S15	LjG1.1_chr3	72767328	76	Exon	LotjaGi3g1v0349800	WRKY transcription factor
IM-S15	LjG1.1_chr3	94145607	10	Exon	LotjaGi3g1v0524500	Receptor-like kinase
IM-S15	LjG1.1_chr4	7717241	13	UTR	LotjaGi4g1v0062500	Cellulose synthase
IM-S15	LjG1.1_chr1	127353509	11	Intergenic
IM-S15	LjG1.1_chr6	53974415	18	Intron	LotjaGi6g1v0231100_LC	Ulp1 protease family
IM-S15	LjG1.1_chr3	60233909	8	Intergenic
IM-S15	LjG1.1_chr4	35982315	8	Intergenic
IM-S15	LjG1.1_chr4	76451914	17	Intergenic
IM-S15	LjG1.1_chr5	13533574	137	Intergenic
IM-S15	LjG1.1_chr6	64922775	84	Intron	LotjaGi6g1v0334700	Wings apart-like protein
IM-S18	LjG1.1_chr1	3289362	5	Intron	LotjaGi1g1v0027100	Rab3 GTPase-activating protein
IM-S18	LjG1.1_chr1	93731312	4	Exon	LotjaGi1g1v0441000	GDSL esterase/lipase family
IM-S18	LjG1.1_chr2	59199257	13	Exon	LotjaGi2g1v0174200	CDT1-like protein
IM-S18	LjG1.1_chr5	3544701	9	Exon	LotjaGi5g1v0018200	Acyltransferase, putative
IM-S23	LjG1.1_chr1	12234025	4	Intron	LotjaGi1g1v0084800	Subtilisin-like serine protease
IM-S23	LjG1.1_chr1	33756024	8	Promoter	LotjaGi1g1v0176000	Phosphoenolpyruvate carboxykinase
IM-S23	LjG1.1_chr1	49599290	4	Intron	LotjaGi1g1v0222600	Endoribonuclease YbeY
IM-S23	LjG1.1_chr1	133181184	11	UTR	LotjaGi1g1v0758400_LC	Regulator of chromosome condensation (RCC1)
IM-S23	LjG1.1_chr2	7693208	4	Promoter	LotjaGi2g1v0021500	DUF241 domain protein
IM-S23	LjG1.1_chr2	74672064	4	Exon	LotjaGi2g1v0274900	Zinc finger protein
IM-S23	LjG1.1_chr2	82070590	4	Exon	LotjaGi2g1v0343300	CYCLOPS
IM-S23	LjG1.1_chr2	87485316	6	Exon	LotjaGi2g1v0377600	Peptide methionine sulfoxide reductase msrB
IM-S23	LjG1.1_chr2	90471961	20	Intron	LotjaGi2g1v0407500_LC	NDX1 homeobox protein
IM-S23	LjG1.1_chr3	92911417	19	Exon	LotjaGi3g1v0512000	Receptor-like kinase
IM-S23	LjG1.1_chr4	2680451	9	Exon	LotjaGi4g1v0022000	Chromodomain-helicase-DNA-binding family protein
IM-S23	LjG1.1_chr4	50883978	7	Intron	LotjaGi4g1v0216300	gamma-irradiation and mitomycin c induced
IM-S23	LjG1.1_chr1	113864726	6	Intergenic
IM-S23	LjG1.1_chr2	75274391	9	Intergenic
IM-S23	LjG1.1_chr3	85406645	4	Intergenic
IM-S23	LjG1.1_chr4	52081008	6	Intergenic
IM-S23	LjG1.1_chr5	4092403	4	Intergenic
IM-S23	LjG1.1_chr5	61369719	4	Intergenic
IM-S23	LjG1.1_chr5	64924666	4	Intron	LotjaGi5g1v0332200	Tetratricopeptide repeat protein 5
IM-S23	LjG1.1_chr6	8368183	5	Intron	LotjaGi6g1v0044400	Eukaryotic translation initiation factor 2 subunit
IM-S23	LjG1.1_chr6	42609645	5	Exon	LotjaGi6g1v0150100_LC	disease resistance family protein
IM-S23	LjG1.1_chr6	62128126	7	Exon	LotjaGi6g1v0303800	Prolyl 4-hydroxylase subunit alpha-like protein
IM-S30	LjG1.1_chr1	60238556	20	Intron	LotjaGi1g1v0251000_LC	SET domain-containing protein
IM-S30	LjG1.1_chr2	82187692	6	UTR	LotjaGi2g1v0344800	ATP-dependent RNA helicase DeaD
IM-S30	LjG1.1_chr5	22730594	4	Intron	LotjaGi5g1v0113800	Serine/arginine rich splicing factor
IM-S34	LjG1.1_chr2	75040212	13	UTR	LotjaGi2g1v0278900	Serine/threonine protein phosphatase 2A
IM-S34	LjG1.1_chr2	75214063	4	Exon	LotjaGi2g1v0280400	BRO1 domain-containing protein
IM-S34	LjG1.1_chr2	75266107	11	Exon	LotjaGi2g1v0280800	Allene oxide cyclase
IM-S34	LjG1.1_chr2	89683183	4	Intron	LotjaGi2g1v0399600	Transmembrane protein 131-like
IM-S34	LjG1.1_chr2	93559216	9	UTR	LotjaGi2g1v0438600	Replication factor-A carboxy-terminal domain protein
IM-S34	LjG1.1_chr3	79569524	9	Intron	LotjaGi3g1v0395800_LC	Calcineurin B, putative
IM-S34	LjG1.1_chr4	80873997	4	Exon	LotjaGi4g1v0435400	50S ribosomal protein L14
IM-S34	LjG1.1_chr5	3810454	6	UTR	LotjaGi5g1v0020500_LC	multidrug resistance-associated protein 1
IM-S34	LjG1.1_chr5	45746013	13	UTR	LotjaGi5g1v0179800	Autophagy-related protein 9
IM-S50	LjG1.1_chr5	23542140	4	Intron	LotjaGi5g1v0115400	ATP dependent RNA helicase

## Sheet: Unique Genic
Chromosome	Position	Location	Gene ID	Gene function	Mutant Lines							Highest Expression Levels	Uninoculated						Symbiosis
													Root_hair_mock_NF	Root_hair_mock_rhizobia	ZON_24hr_mock	3dpi_root_mock	AM_mock_15d	AM_mock_27d	Root_hair_NF_24hr	Root_hair_R7A_24hr	Root_hair_R7A_72hr	ZON_24hr_R7A	3dpi_root_R7A	Nodule_primordia_7dpi	Nodules_10dpi	Nodules_21dpi	AM_15dpi	AM_27dpi
LjG1.1_chr4	80873997	Exon	LotjaGi4g1v0435400	50S ribosomal protein L14	IM-S34							Uninoculated	0.352	0.5	0.153	0.051	0.372	1	0.23	0.316	0.255	0.214	0.189	0.01	0	0.005	0.041	0.679
LjG1.1_chr1	103880718	Intron	LotjaGi1g1v0516200	50S ribosomal protein L24	IM-S15							Symbiosis	0.325	0.179	0.241	0.418	0.647	0	0.233	0.177	0.213	0.358	0.406	1	0.561	0.595	0.303	0.056
LjG1.1_chr3	88991144	Intron	LotjaGi3g1v0472700	5'-3' exoribonuclease 3	IM-N7							Uninoculated	0.044	0.009	0.774	1	0.206	0.23	0.069	0	0.01	0.52	0.768	0.155	0.192	0.291	0.244	0.275
LjG1.1_chr5	3544701	Exon	LotjaGi5g1v0018200	Acyltransferase, putative	IM-S18							Symbiosis	0.77	0.858	0.571	0.129	0.03	0.227	0.827	0.974	1	0.471	0.168	0.21	0.382	0.218	0.091	0
LjG1.1_chr2	75266107	Exon	LotjaGi2g1v0280800	Allene oxide cyclase	IM-S34							Symbiosis	0.449	0.542	0.165	0.017	0.414	0.423	0.426	0.447	0.507	0.428	0	0.111	0.683	0.037	0.281	1
LjG1.1_chr3	93834698	Exon	LotjaGi3g1v0521600	Amino acid permease	IM-D18	IM-D34						Symbiosis	0.001	0.001	0.005	0.006	0.012	0.006	0.001	0.001	0	0.003	0.005	0.022	1	0.29	0.002	0
LjG1.1_chr6	63466952	Exon	LotjaGi6g1v0317000	Aquaporin	IM-D24							Uninoculated	0.839	1	0.237	0.091	0.013	0.392	0.88	0.867	0.933	0.1	0.059	0	0	0.072	0.048	0.148
LjG1.1_chr5	23542140	Intron	LotjaGi5g1v0115400	ATP dependent RNA helicase	IM-S50							Symbiosis	0.559	0.278	0.131	0.099	0.136	0.351	0.359	0.295	0.221	0	0.11	0.19	0.397	0.402	0.293	1
LjG1.1_chr2	82187692	UTR	LotjaGi2g1v0344800	ATP-dependent RNA helicase DeaD	IM-S30							Symbiosis	0.158	0.169	0.565	0.518	0.228	0.139	0.19	0.132	0.125	0.276	0.528	1	0.61	0.577	0.222	0
LjG1.1_chr5	45746013	UTR	LotjaGi5g1v0179800	Autophagy-related protein 9	IM-S34							Uninoculated	0.777	1	0.208	0.161	0.081	0.153	0.545	0.745	0.695	0.14	0.145	0.166	0.708	0.608	0.073	0
LjG1.1_chr2	75214063	Exon	LotjaGi2g1v0280400	BRO1 domain-containing protein	IM-N10	IM-S34						Uninoculated	0.045	0.045	0.342	1	0.774	0.761	0.008	0.025	0	0.251	0.461	0.292	0.424	0.107	0.531	0.597
LjG1.1_chr3	79569524	Intron	LotjaGi3g1v0395800_LC	Calcineurin B, putative	IM-S34							Symbiosis	0.203	0.525	0.322	0.678	0.136	0.627	0.237	0.475	0	0	1	0.271	0.627	0	0	0.085
LjG1.1_chr2	59199257	Exon	LotjaGi2g1v0174200	CDT1-like protein	IM-S18							Symbiosis	0.07	0.081	0.62	0.526	0.584	0.418	0	0.067	0.046	1	0.49	0.744	0.293	0.276	0.702	0.32
LjG1.1_chr6	47603340	Exon	LotjaGi6g1v0183200	Cellulose synthase	IM-D22	IM-D34	IM-O19					Symbiosis	0.913	0.792	0.315	0.153	0.123	0.111	1	0.82	0.853	0.22	0.137	0.099	0.171	0.37	0.134	0
LjG1.1_chr4	7717241	UTR	LotjaGi4g1v0062500	Cellulose synthase	IM-S15							Symbiosis	0.193	0.378	0.142	0.56	0	0.178	0.53	0.394	0.922	0.188	0.934	0.11	0.296	1	0.164	0.192
LjG1.1_chr4	2680451	Exon	LotjaGi4g1v0022000	Chromodomain-helicase-DNA-binding family protein	IM-D21	IM-D22	IM-D34	IM-S23	IM-A68			Symbiosis	0.374	0.612	0.057	0.332	0.021	0.119	0.398	0.589	0.516	0.019	0.339	0.623	0.689	1	0.271	0
LjG1.1_chr2	26484287	Intron	LotjaGi2g1v0090100	Cleavage stimulation factor subunit	IM-D18	IM-MY21						Symbiosis	0.627	0.629	0.736	0.802	0.358	0.352	0.601	0.569	0.56	0.316	0.828	1	0.703	0.678	0.42	0
LjG1.1_chr1	103947308	Exon	LotjaGi1g1v0516700	COBRA-like protein	IM-S15							Symbiosis	0.009	0.012	0.695	0.83	0.789	0.466	0.092	0.032	0.02	0.261	0.94	0.09	0.07	0	1	0.319
LjG1.1_chr2	82070590	Exon	LotjaGi2g1v0343300	CYCLOPS	IM-D22	IM-D34	IM-O19	IM-S23				Symbiosis	0.224	0.238	0.049	0.039	0.025	0.035	0.242	0.305	0.25	0.022	0.044	0.295	1	0.833	0.017	0
LjG1.1_chr2	90471961	Intron	LotjaGi2g1v0407500_LC	Cytosolic Fe-S cluster assembly factor NAR1	IM-A68	IM-D34	IM-N4	IM-O19	IM-D18	IM-S23		Uninoculated	0.224	0.205	0.373	1	0.396	0.252	0.33	0.343	0.26	0.631	0.766	0.963	0.343	0.682	0.549	0
LjG1.1_chr3	97531106	Intron	LotjaGi3g1v0557400_LC	DEAD-box ATP-dependent RNA helicase	IM-D18	IM-D34						Symbiosis	0.057	0.089	0.33	0.365	0.156	0.114	0.077	0.138	0.133	0.42	0.345	1	0.431	0	0.198	0.082
LjG1.1_chr1	37252915	Intron	LotjaGi1g1v0189800	Dentin sialophosphoprotein-like protein	IM-D11							Uninoculated	0.654	1	0.359	0.698	0.25	0.223	0.591	0.987	0.95	0.284	0.705	0.854	0.619	0.972	0.275	0
LjG1.1_chr3	66783772	Intron	LotjaGi3g1v0315400	Dentin sialophosphoprotein-related	IM-D30							Symbiosis	0.052	0.983	0.629	0.259	0.006	0	0.718	0.818	1	0.461	0.196	0.103	0.171	0.48	0.009	0.23
LjG1.1_chr6	42609645	Exon	LotjaGi6g1v0150100_LC	disease resistance family protein	IM-D34	IM-N4	IM-O19	IM-S23	IM-D24			Symbiosis	0.858	0.875	0.051	0.042	0.016	0.019	0.924	1	0.83	0.048	0.04	0.069	0.008	0.014	0	0.024
LjG1.1_chr2	7693208	Promoter	LotjaGi2g1v0021500	DUF241 domain protein	IM-S23							Uninoculated	0	0.012	0.052	0.182	1	0.32	0.006	0.006	0.023	0.063	0.367	0.09	0.005	0	0.213	0.416
LjG1.1_chr3	29629905	UTR	LotjaGi3g1v0202800	E3 ubiquitin-protein ligase	IM-N7							Symbiosis	0.07	0.034	0.086	0.02	0.124	0.232	0.072	0.059	0.023	0.114	0.017	0	0.049	0.074	0.154	1
LjG1.1_chr2	80642430	Intron	LotjaGi2g1v0330800	Endoribonuclease E-like protein	IM-D21	IM-D34						Uninoculated	0.139	0.053	0.671	1	0.766	0.686	0	0.034	0.064	0.775	0.898	0.82	0.499	0.479	0.505	0.379
LjG1.1_chr1	49599290	Intron	LotjaGi1g1v0222600	Endoribonuclease YbeY	IM-S23							Uninoculated	0.33	0.414	0.421	1	0.585	0.115	0.398	0.281	0.357	0.379	0.992	0.978	0.663	0.996	0.64	0
LjG1.1_chr6	8368183	Intron	LotjaGi6g1v0044400	Eukaryotic translation initiation factor 2 subunit	IM-D18	IM-D34	IM-N4	IM-S23				Symbiosis	0.099	0.031	0.882	0.006	0.676	0.391	0.091	0.035	0.019	1	0	0.228	0.788	0.178	0.125	0.769
LjG1.1_chr5	67923998	UTR	LotjaGi5g1v0364000	Eukaryotic translation initiation factor 3	IM-D24							Symbiosis	0.352	0.225	0.57	0.322	0.102	0.496	0.352	0.323	0.351	0.769	0.2	0.214	0	0.004	0.019	1
LjG1.1_chr4	50883978	Intron	LotjaGi4g1v0216300	gamma-irradiation and mitomycin c induced	IM-S23							Symbiosis	0.139	0.187	0.107	0.097	0.042	0.02	0.159	0.267	0.217	0.066	0.081	0.423	1	0.334	0.133	0
LjG1.1_chr1	93731312	Exon	LotjaGi1g1v0441000	GDSL esterase/lipase family	IM-S18							Uninoculated	0.076	0	1	0.417	0.756	0.476	0.134	0.022	0.097	0.963	0.446	0.415	0.387	0.048	0.4	0.443
LjG1.1_chr2	92887255	Intron	LotjaGi2g1v0431900	Generative cell specific-1	IM-D30							Symbiosis	0.014	0	0.083	0.111	0.056	0.222	0.014	0	0.028	0	0.132	0.701	1	0	0	0.931
LjG1.1_chr2	68303856	Exon	LotjaGi2g1v0225900	Glutamate carboxypeptidase 2	IM-S15							Symbiosis	0	0.003	0.138	0.153	0.096	0.213	0.04	0.011	0.041	0.077	0.132	0.467	1	0.763	0.226	0.191
LjG1.1_chr1	80506185	Intron	LotjaGi1g1v0342700	Golgi-body localization protein domain isoform	IM-MY21							Symbiosis	0.561	0.859	0.036	0.268	0.053	0.051	0.514	1	0.799	0.008	0.278	0.244	0.18	0.55	0.094	0
LjG1.1_chr2	51747974	Intron	LotjaGi2g1v0142100_LC	Guanine nucleotide-binding protein subunit beta-like protein	IM-O4							Uninoculated	1	0.895	0.658	0.651	0.378	0.424	0.9	0.822	0.753	0.71	0.667	0.341	0.485	0.631	0.276	0
LjG1.1_chr3	85406645	UTR	LotjaGi3g1v0441300	H/ACA ribonucleoprotein complex non-core subunit NAF1	IM-D24							Symbiosis	0.191	0	0.173	0.453	0.029	0.511	0.143	0.168	0.029	0.746	0.38	1	0.227	0.299	0.258	0.534
LjG1.1_chr3	5520270	Promoter	LotjaGi3g1v0052700	heat-inducible transcription repressor	IM-D18	IM-D34						Symbiosis	0	0.294	0	0.059	0.235	0	0	0	0	0	0.059	0.235	0	1	0	0
LjG1.1_chr6	50952709	Exon	LotjaGi6g1v0212100	inositol transporter 2	IM-O4							Symbiosis	0.145	0.578	0.198	0.907	0.027	0.043	0.319	0.201	0.149	0.115	1	0.248	0	0.013	0.124	0.056
LjG1.1_chr3	63768418	Intron	LotjaGi3g1v0304300	Integral membrane family protein	IM-S15							Uninoculated	1	0.866	0.312	0.046	0.15	0.155	0.894	0.825	0.681	0.43	0	0.391	0.459	0.318	0.319	0.306
LjG1.1_chr5	48616325	UTR	LotjaGi5g1v0192700	Ion channel pollux-like protein	IM-D21	IM-D22	IM-D34					Symbiosis	0.099	0	0.254	0.936	0.474	0.302	0.056	0.013	0.187	0.128	1	0.926	0.327	0.604	0.185	0.061
LjG1.1_chr2	12156058	Intron	LotjaGi2g1v0058300	Laminin subunit gamma-1	IM-A60	IM-O4	IM-O7					Symbiosis	0.667	0.323	0.357	0.144	0.18	0.26	0.503	0.299	0.26	0	0.131	0.065	0.467	1	0.204	0.082
LjG1.1_chr2	85543449	Intron	LotjaGi2g1v0347900	Late embryogenesis abundant (LEA)hydroxyproline-rich glycoprotein	IM-D18	IM-D24						Uninoculated	0.052	0.034	0.457	0.453	1	0.268	0	0.078	0.032	0.612	0.322	0.185	0.133	0.068	0.521	0.765
LjG1.1_chr5	3663187	Intron	LotjaGi5g1v0018900	Leishmanolysin-like peptidase	IM-D18	IM-D34	IM-O19					Symbiosis	0.079	0.025	0.353	0.361	0.361	0.453	0	0.1	0.084	0.057	0.378	1	0.309	0.336	0.626	0.486
LjG1.1_chr1	81346150	UTR	LotjaGi1g1v0346300	LINE-1 reverse transcriptase like	IM-O4							Symbiosis	0	0.057	0.035	0.101	0.046	0.174	0.005	0	0.025	0.041	0.109	0.163	0.379	1	0.049	0.084
LjG1.1_chr5	3810454	UTR	LotjaGi5g1v0020500_LC	multidrug resistance-associated protein 1	IM-S34							Symbiosis	0.394	0.669	0.02	0.16	0.074	0.002	0.333	0.68	0.551	0.022	0.232	0.06	0.149	1	0	0.011
LjG1.1_chr4	12017306	Intron	LotjaGi4g1v0090700	myb-like protein	IM-D25	IM-D30	IM-D34					Symbiosis	0.978	0.647	0.133	0.548	0.094	0.044	1	0.818	0.514	0.112	0.479	0.375	0.285	0.067	0.482	0
LjG1.1_chr1	458177	Intron	LotjaGi1g1v0001400	Niemann-Pick C1 protein	IM-D24							Uninoculated	0.991	1	0.19	0.364	0.101	0.208	0.716	0.873	0.811	0	0.375	0.352	0.37	0.453	0.205	0.194
LjG1.1_chr4	59015450	Exon	LotjaGi4g1v0241900	Nuclear mitotic apparatus 1	IM-D21	IM-D34						Symbiosis	0.466	0.873	0.284	0.117	0.136	0.044	0.544	1	0.884	0.432	0.172	0.12	0.385	0.83	0.153	0
LjG1.1_chr6	56500638	Exon	LotjaGi6g1v0252600	Pectin lyase-like superfamily protein	IM-D22							Uninoculated	0	0	1	0.3	0	0.8	0	0	0	0	0.1	0.4	0	0	0	0.5
LjG1.1_chr3	68164104	Exon	LotjaGi3g1v0321000	Pentatricopeptide repeat-containing protein	IM-N6							Symbiosis	0.162	0.288	0.303	0.605	0.53	0.379	0.113	0.222	0.32	0.212	0.606	1	0.431	0.701	0.171	0
LjG1.1_chr4	71993962	Exon	LotjaGi4g1v0340200	Pentatricopeptide repeat-containing protein	IM-N7							Symbiosis	0.206	0.178	0.362	0.771	0.689	0.567	0.158	0.428	0.283	0.503	0.634	1	0.617	0.398	0.681	0
LjG1.1_chr2	87485316	Exon	LotjaGi2g1v0377600	Peptide methionine sulfoxide reductase msrB	IM-D18	IM-D34	IM-S23					Uninoculated	0.256	0.337	0.179	0.007	1	0.191	0.23	0.292	0.282	0.13	0	0.026	0.441	0.326	0.132	0.973
LjG1.1_chr1	33756024	Promoter	LotjaGi1g1v0176000	Phosphoenolpyruvate carboxykinase	IM-S23							Uninoculated	0.169	0	1	0.393	0.103	0.115	0.039	0.001	0.035	0.623	0.331	0.122	0.241	0.324	0.044	0.036
LjG1.1_chr3	68168242	UTR	LotjaGi3g1v0321100_LC	Phosphoenolpyruvate carboxylase	IM-N6							Symbiosis	0.083	0.231	0	0.046	0.009	0	0.046	0.324	0.12	0	0	0.009	0	1	0.019	0.037
LjG1.1_chr4	54821094	Exon	LotjaGi4g1v0234300_LC	Poly [ADP]-ribose] polymerase	IM-D24							Symbiosis	0.147	0.213	0.066	0.046	0.173	0	0.183	0.213	0.071	0.584	0	0.264	1	0.579	0.218	0.066
LjG1.1_chr6	62128126	Exon	LotjaGi6g1v0303800	Prolyl 4-hydroxylase subunit alpha-like protein	IM-A68	IM-D34	IM-MY21	IM-S23				Uninoculated	1	0.745	0.039	0.211	0.187	0.034	0.87	0.775	0.82	0.077	0.224	0.221	0	0.06	0.056	0.077
LjG1.1_chr3	89026534	Exon	LotjaGi3g1v0473300	Protein FAM210B-like protein	IM-N7							Symbiosis	0.466	0.419	0.201	0.085	0.062	0.172	0.344	0.305	0.381	0.229	0.043	0.118	0.603	1	0	0.08
LjG1.1_chr4	13313124	Intron	LotjaGi4g1v0098500	Protein FRIGIDA	IM-D21	IM-D34	IM-N4					Symbiosis	0.01	0.342	0.574	0.078	0.432	0.369	0.495	0.571	0.363	0.982	0.217	0.832	0.301	0	0.404	1
LjG1.1_chr2	43588417	Intron	LotjaGi2g1v0119300	Protein kinase family protein	IM-D18	IM-D34						Symbiosis	0.183	0.323	0.48	0.356	0	0.246	0.232	0.232	0.236	0.253	0.341	0.198	0.158	1	0.108	0.065
LjG1.1_chr6	53436363	Intron	LotjaGi6g1v0228400	Protein phosphatase 2c	IM-MY21							Uninoculated	1	0.519	0.198	0.373	0.232	0.202	0.481	0.411	0.351	0.121	0.459	0.058	0	0.123	0.201	0.097
LjG1.1_chr3	62458656	UTR	LotjaGi3g1v0299400	Purple acid phosphatase	IM-N7							Symbiosis	0.387	0.379	0.122	0.142	0.443	0.528	0.327	0.347	0.387	0.091	0.189	0.009	0.088	0.037	1	0
LjG1.1_chr1	18730968	UTR	LotjaGi1g1v0118700_LC	putative disease resistance protein RGA3	IM-D22	IM-D34						Symbiosis	0.105	0.071	0.046	0.323	0.236	0.019	0.063	0.044	0.042	0.071	0.322	0.206	0.303	1	0.169	0
LjG1.1_chr1	3289362	Intron	LotjaGi1g1v0027100	Rab3 GTPase-activating protein	IM-S18							Symbiosis	0.472	0.609	0.249	0.198	0.115	0.074	0.617	1	0.856	0.231	0.263	0.128	0.007	0.064	0.107	0
LjG1.1_chr3	92911417	Exon	LotjaGi3g1v0512000	Har1	IM-8	IM-A68	IM-D34	IM-MY21	IM-N4	IM-O19	IM-S15	Symbiosis	0	0.001	0.279	0.173	0.108	0.219	0.008	0.005	0.001	0.194	0.125	0.046	0.088	0.072	0.231	1
LjG1.1_chr1	133181184	UTR	LotjaGi1g1v0758400_LC	Regulator of chromosome condensation (RCC1)	IM-A55	IM-MY21	IM-N4	IM-S23	IM-S34			Symbiosis	0.08	0	0	0.1	0.03	0.13	0.09	0.12	0	0	0.03	0	0	0	1	0.11
LjG1.1_chr2	93559216	UTR	LotjaGi2g1v0438600	Replication factor-A carboxy-terminal domain protein	IM-S34							Uninoculated	0.237	0.166	0.112	0.367	0.145	1	0.238	0.209	0.157	0.166	0.269	0.262	0.12	0.199	0	0.816
LjG1.1_chr3	53305926	Exon	LotjaGi3g1v0273500	RHO guanyl-nucleotide exchange factor	IM-D18	IM-D34	IM-O19					Symbiosis	0.283	0.092	0.181	0.571	0.327	0.09	0.431	0.187	0.194	0.24	0.668	1	0.42	0.328	0.684	0
LjG1.1_chr1	19797457	Exon	LotjaGi1g1v0125400	Ribonuclease E/G family protein	IM-N12							Symbiosis	0.069	0.104	0.138	0.358	0.136	0.124	0.067	0.095	0.135	0.224	0.397	0.428	1	0.472	0.134	0
LjG1.1_chr1	119612095	UTR	LotjaGi1g1v0639600	Ricin B lectin domain-containing protein	IM-A55							Uninoculated	0.818	1	0.351	0.119	0	0.053	0.8	0.403	0.564	0.284	0.064	0.115	0.092	0.44	0.034	0.765
LjG1.1_chr2	46676659	Exon	LotjaGi2g1v0127100	S-acyltransferase	IM-8	IM-A68	IM-MY21					Symbiosis	0.749	0.889	0.542	0.621	0.633	0.751	0.772	0.916	0.78	0.435	0.627	0.292	0	0.058	1	0.68
LjG1.1_chr2	6336225	Intron	LotjaGi2g1v0018200	S-acyltransferase	IM-S15							Symbiosis	0.898	0.894	0.557	0.205	0.53	0.384	0.89	1	0.967	0.37	0.252	0.223	0.196	0.054	0	0.127
LjG1.1_chr5	22730594	Intron	LotjaGi5g1v0113800	Serine/arginine rich splicing factor	IM-S30							Uninoculated	0.235	0.242	1	0.256	0.101	0.235	0.341	0.215	0.219	0.746	0.197	0.11	0.135	0.266	0	0.408
LjG1.1_chr2	75040212	UTR	LotjaGi2g1v0278900	Serine/threonine protein phosphatase 2A	IM-S34							Uninoculated	0.999	0.784	0.132	0.588	0.607	0.911	0.926	0.716	0.712	0	0.655	0.742	0.67	0.818	0.719	1
LjG1.1_chr1	60238556	Intron	LotjaGi1g1v0251000_LC	SET domain-containing protein	IM-S30							Symbiosis	0.321	0.492	0.437	0.608	0	0.059	0.397	0.458	0.461	0.333	0.61	0.811	0.552	1	0.008	0.253
LjG1.1_chr5	47301225	UTR	LotjaGi5g1v0186200	Sieve element occlusion protein	IM-D22	IM-D34						Uninoculated	0.001	0.001	0.999	0.426	0.615	0.166	0.006	0	0.002	1	0.442	0.182	0.05	0.002	0.465	0.285
LjG1.1_chr2	75554089	Intron	LotjaGi2g1v0283100	SOSS complex subunit B like	IM-D30							Symbiosis	0.28	0.193	0.133	0.289	0.083	0.062	0.202	0.246	0.314	0.198	0.381	0.491	0.448	1	0	0.103
LjG1.1_chr6	47326777	Intron	LotjaGi6g1v0181200	Squalene monooxygenase	IM-N7							Symbiosis	0.581	0.869	0.532	0.291	0.127	0.506	0.705	1	0.949	0.228	0.188	0.823	0.707	0	0.041	0.45
LjG1.1_chr2	72767929	Exon	LotjaGi2g1v0259700	Starch synthase	IM-D25	IM-D30	IM-D34	IM-N4	IM-O19			Symbiosis	0.114	0.054	0.414	0.287	0.395	0.222	0.039	0	0.046	0.233	0.303	0.528	0.832	1	0.566	0.157
LjG1.1_chr1	12234025	Intron	LotjaGi1g1v0084800	Subtilisin-like serine protease	IM-S23							Symbiosis	0	0.001	0.038	0.02	0.074	0.046	0.002	0.001	0.001	0.07	0.018	0.052	1	0.249	0.104	0.081
LjG1.1_chr2	77271037	Intron	LotjaGi2g1v0298200	T-box transcription factor, putative (DUF863)	IM-S15							Symbiosis	0.338	0.163	0.423	0.516	0.28	0.338	0.18	0.225	0.243	0.277	0.622	0.65	0.655	1	0.658	0
LjG1.1_chr5	64924666	Intron	LotjaGi5g1v0332200	Tetratricopeptide repeat protein 5	IM-S23							Uninoculated	0.639	1	0.33	0.295	0.34	0.207	0.745	0.981	0.89	0.25	0.282	0.237	0.113	0.105	0.057	0
LjG1.1_chr2	89683183	Intron	LotjaGi2g1v0399600	Transmembrane protein 131-like	IM-S34							Symbiosis	0.081	0	0.268	0.442	0.11	0.971	0.047	0.059	0.113	0.426	0.368	0.454	0.895	1	0.951	0.54
LjG1.1_chr4	80752406	Intron	LotjaGi4g1v0433200	Trichome birefringence-like protein	IM-A55							Symbiosis	0.288	0.299	0.561	0.368	0.531	0.464	0.304	0.277	0.224	0.39	0.331	0.306	0.315	0	1	0.576
LjG1.1_chr5	49858598	Intron	LotjaGi5g1v0200100	UDP-N-acetylglucosamine--peptide	IM-N7							Symbiosis	0.195	0.375	0.177	0.222	0.308	0.266	0.493	0.586	0.291	0.109	0.166	0.61	1	0	0.453	0.306
LjG1.1_chr6	53974415	Intron	LotjaGi6g1v0231100_LC	Ulp1 protease family	IM-S15							Symbiosis	0.004	0.034	0	0.014	0.01	0.021	0.005	0.031	0.028	0.025	0.076	0.016	0.11	1	0.005	0.019
LjG1.1_chr1	136240887	Intron	LotjaGi1g1v0790600_LC	UPF0183 protein	IM-S15							Symbiosis	0.474	0.504	0.473	0.797	0.268	0.319	0.378	0.569	0.655	0.37	0.992	1	0.531	0.837	0	0.091
LjG1.1_chr4	28550673	UTR	LotjaGi4g1v0160100	Very-long-chain (3R)-3-hydroxyacyl-CoA dehydratase	IM-D30							Uninoculated	0.013	0.046	1	0.15	0.309	0.177	0.021	0.04	0	0.523	0.157	0.302	0.241	0.121	0.232	0.276
LjG1.1_chr6	64922775	Intron	LotjaGi6g1v0334700	Wings apart-like protein	IM-S15							Symbiosis	0.224	0.292	0.173	0.114	0.041	0.037	0.263	0.253	0.314	0.045	0.149	0.584	0.895	1	0.111	0
LjG1.1_chr3	72767328	Exon	LotjaGi3g1v0349800	WRKY transcription factor	IM-S15							Uninoculated	0.02	0.029	0.02	0.027	1	0.068	0.023	0.022	0.031	0.023	0.04	0.013	0	0	0.039	0.013
LjG1.1_chr2	74672064	Exon	LotjaGi2g1v0274900	Zinc finger protein	IM-D22	IM-D34	IM-O19	IM-S23				Uninoculated	0	0.006	1	0.824	0.14	0.28	0.01	0.011	0.003	0.453	0.645	0.064	0.013	0.037	0.342	0.406
LjG1.1_chr2	86599068	Intron	LotjaGi2g1v0368500	NDX1 homeobox protein	IM-D18							Symbiosis	0.549	0.69	0.535	0.824	0.568	0.213	0.577	0.748	0.59	0.433	0.813	0.982	0.73	1	0.631	0
* Normalized expression leves were obtained from the Lotus Gene Expression Atlas

## Sheet: Phenotype
Line ID	Sequenced	Subset 20	Phenotype	Leaf	Avg. Nod	n
Gifu	N/A	N/A	N/A	Green	4.2	10
IM-25	YES	YES	Fix-	Yellow	3.2	20
IM-53	YES	YES	Fix-	Yellow	1.22	9
IM-58	YES	YES	Fix-	Yellow	3.6	10
IM-118	YES	YES	Fix-	Yellow	3.8	10
IM-A19	YES	YES	Fix-	Yellow	5.3	10
IM-A39	YES	YES	Nod-	Yellow	0	10
IM-A55	YES	YES	Fix-	Yellow	3.6	10
IM-A68	YES	YES	Fix-	Yellow	4.11	19
IM-D08	YES	YES	Fix-	Yellow	3.14	15
IM-D09	YES	YES	Fix-	Yellow	2.85	20
IM-D11	YES	YES	Fix-	Yellow	3	8
IM-D24	YES	YES	Fix-	Yellow	4.37	19
IM-D25	YES	YES	Fix-	Yellow	3.8	20
IM-D26	YES	YES	Fix-	Yellow	4.17	19
IM-N04	YES	YES	Fix-	Green	3.57	7
IM-N12	YES	YES	Fix-	Yellow	2.7	10
IM-O7	YES	YES	Fix-	Yellow	3.7	20
IM-D30	YES	YES	Fix-	Yellow	3	7
IM-O33	YES	YES	Fix-	Yellow	4.3	20
IM-S30	YES	YES	Fix-	Green	1.8	10
IM-116	YES	NO	Fix-	Yellow	2	9
IM-130	No	No	Fix-	Yellow	0.67	9
IM-197	No	No	Fix-	Green	0.43	7
IM-202	No	No	Fix-	Yellow	0.64	11
IM-21	YES	NO	Fix-	Yellow	1.8	5
IM-227	No	No	Fix-	Yellow	0.6	10
IM-251	No	No	Fix-	Yellow	2.5	10
IM-257	No	No	Fix-	Yellow	4.43	7
IM-261	No	No	Fix-	Yellow	3.25	8
IM-269	No	No	Fix-	Yellow	2.5	8
IM-277	No	No	Fix-	Yellow	1	14
IM-281	No	No	Fix-	Yellow	1.92	12
IM-304	No	No	Fix-	Yellow	1.33	12
IM-353	No	No	Fix-	Yellow	0.58	12
IM-358	No	No	Fix-	Yellow	0.5	4
IM-360	No	No	Fix-	Yellow	2.4	10
IM-363	No	No	Fix-	Yellow	0.4	10
IM-364	No	No	Fix-	Yellow	0.73	11
IM-365	No	No	Fix-	Yellow	1.1	9
IM-380	No	No	Fix-	Yellow	0.17	12
IM-56	YES	NO	Fix-	Yellow	1.22	9
IM-59	YES	NO	Fix-	Green	0.2	10
IM-A102	No	No	Fix-	Yellow	0.64	14
IM-A108	No	No	Fix-	Yellow	0.5	12
IM-A110	No	No	Fix-	Yellow	2.6	10
IM-A111	No	No	Fix-	Yellow	0.42	12
IM-A114	No	No	Fix-	Yellow	0.67	12
IM-A116	YES	NO	Fix-	Yellow	0.5	10
IM-A117	No	No	Fix-	Yellow	1.2	10
IM-A131	No	No	Fix-	Yellow	0.33	12
IM-A20	YES	NO	Fix-	Green	0.3	10
IM-A30	No	No	Fix-	Yellow	1.15	13
IM-A32	No	No	Fix-	Yellow	0.86	14
IM-A33	No	No	Fix-	Yellow	1.23	13
IM-A34	No	No	Fix-	Yellow	1.09	11
IM-A40	No	No	Fix-	Yellow	1.1	10
IM-A46	No	No	Fix-	Yellow	0.83	12
IM-A52	No	No	Fix-	Yellow	0.77	13
IM-A53	No	No	Fix-	Yellow	2	10
IM-A60	YES	NO	Fix-	Yellow	1.5	10
IM-A66	No	No	Fix-	Green	0.6	10
IM-A80	No	No	Fix-	Yellow	2.6	10
IM-A88	No	No	Fix-	Yellow	1.36	11
IM-A93	No	No	Fix-	Yellow	2.7	10
IM-A96	No	No	Fix-	Yellow	1.2	10
IM-Ap4	No	No	Fix-	Yellow	0.25	12
IM-Ap8	No	No	Fix-	Yellow	0.17	12
IM-D14	YES	NO	Fix-	Yellow	0.5	12
IM-D19	YES	NO	Fix-	Yellow	0.33	12
IM-D21	YES	NO	Nod-	Yellow	0	12
IM-D22	YES	NO	Nod-	Yellow	0	12
IM-D29	No	No	Fix-	Yellow	0.83	12
IM-D33	No	No	Fix-	Yellow	0.75	12
IM-D34	YES	NO	Fix-	Yellow	0.33	12
IM-F10	No	No	Fix-	Yellow	0.27	11
IM-F18	No	No	Fix-	Yellow	1.67	12
IM-F19	No	No	Fix-	Yellow	0.92	13
IM-F21	No	No	Fix-	Yellow	0.54	13
IM-F25	No	No	Fix-	Yellow	0.25	12
IM-F28	No	No	Fix-	Yellow	0.25	16
IM-F3	No	No	Fix-	Yellow	0.1	10
IM-F5	No	No	Fix-	Green	0.18	11
IM-F8	No	No	Fix-	Yellow	1.5	14
IM-M11	No	No	Fix-	Yellow	0.33	15
IM-My05	No	No	Fix-	Green	0.38	16
IM-My20	No	No	Fix-	Green	1.21	14
IM-My21	YES	NO	Fix-	Green	2.07	15
IM-N01	No	No	Hypernodulation	Green	6.56	9
IM-N06	YES	NO	Fix-	Yellow	0.7	10
IM-N07	YES	NO	Nod-	Yellow	0.11	9
IM-N09	No	No	Fix-	Yellow	0.56	11
IM-N10	YES	NO	Nod-	Yellow	0	10
IM-O19	YES	NO	Fix-	Yellow	0.7	10
IM-O24	YES	NO	Fix-	Yellow	0.9	10
IM-O26	YES	NO	Fix-	Yellow	0.7	10
IM-O4	YES	No	Fix-	Yellow	4.16	19
IM-S15	YES	NO	Fix-	Green	0.33	12
IM-S18	YES	NO	Fix-	Yellow	0.9	10
IM-S23	YES	NO	Fix-	Yellow	1.2	10
IM-S27	No	No	Fix-	Yellow	1.9	10
IM-S34	YES	NO	Fix-	Yellow	2.43	10
IM-S50	YES	NO	Fix-	Green	0.7	10
IM-8	YES	No	Fix-	Yellow	0.25	12
IM-S10	No	No	Fix-	Yellow	0.7	10
IM-10	No	No	Fix-	Yellow	0.11	9
IM-A9	No	No	Fix-	Yellow	0.8	10
IM-A87	No	No	Fix-	Yellow	1.6	12
IM-A94	No	No	Fix-	Yellow	0.8	11
IM-A7	No	No	Fix-	Yellow	1.27	10
IM-D18	YES	No	Fix-	Yellow	2.3	11
