# Supplementary material for: A collection of novel Lotus japonicus LORE1 mutants perturbed in the nodulation program induced by the Agrobacterium pusense strain IRBG74
Source: Front Plant Sci. 2024 Jan 5;14:1326766. doi: 10.3389/fpls.2023.1326766 (PMC10796720; doi:10.3389/fpls.2023.1326766)
Supplement: Supplementary Table 2 — List of primers used for LORE1 genome mapping and genotyping. [file Table_2.xlsx]

## Sheet: Primers
Primer ID	Sequence
IA-SPLshort	CCACTAGTGTCGACACCAGTCTCTAATTTTTTTTTTCAAAAAAA
IA-SPLlong	CGAAGAGTAACCGTTGCTAGGAGAGACCGTGGCTGAATGAGACTGGTGTCGACACTAGTGGT
Splink 1	CGAAGAGTAACCGTTGCTAGGAGAGACC
Splink 2	NNGTGGCTGAATGAGACTGGTGTCGAC
P2	CCATGGCGGTTCCGTGAATCTTAGG
P3-R2	AACGATTccaactaacaacccagctaacagt
P3-R3	AACGCGCccaactaacaacccagctaacagt
P3-R4	AACTTCGccaactaacaacccagctaacagt
P3-R8	AAGCGGAccaactaacaacccagctaacagt
P3-R9	AAGGACCccaactaacaacccagctaacagt
P3-R10	AAGGCATccaactaacaacccagctaacagt
P3-R11	AATACGAccaactaacaacccagctaacagt
P3-R12	AATCTGCccaactaacaacccagctaacagt
P3-R13	AATGGACccaactaacaacccagctaacagt
P3-R14	AATTCAGccaactaacaacccagctaacagt
P3-R15	ACCAATCccaactaacaacccagctaacagt
P3-R16	ACCGTAAccaactaacaacccagctaacagt
P3-R17	ACGAAGGccaactaacaacccagctaacagt
P3-R18	ACGCTCCccaactaacaacccagctaacagt
P3-R20	ACTAGGCccaactaacaacccagctaacagt
P3-R21	ACTATAGccaactaacaacccagctaacagt
P3-R22	ACTGCGTccaactaacaacccagctaacagt
P3-R23	ACTGGCAccaactaacaacccagctaacagt
P3-R24	ACTTCTCccaactaacaacccagctaacagt
P3-R25	ACTTGATccaactaacaacccagctaacagt
P3-R26	AGAATCGccaactaacaacccagctaacagt
P3-R27	AGACGGTccaactaacaacccagctaacagt
P3-R28	AGACTTAccaactaacaacccagctaacagt
P3-R29	AGATGAAccaactaacaacccagctaacagt
P3-R30	AGCAGGAccaactaacaacccagctaacagt
P3-R31	AGCCAACccaactaacaacccagctaacagt
P3-R32	AGCGTCCccaactaacaacccagctaacagt
P3-R33	AGCTGCTccaactaacaacccagctaacagt
P3-R34	AGGACGCccaactaacaacccagctaacagt
P3-R35	AGGTACGccaactaacaacccagctaacagt
P3-R36	AGTACCTccaactaacaacccagctaacagt
P3-R37	ATAAGACccaactaacaacccagctaacagt
P3-R38	ATAGGTTccaactaacaacccagctaacagt
P3-R39	ATATATGccaactaacaacccagctaacagt
P3-R40	ATATCCAccaactaacaacccagctaacagt
P3-R41	ATATTGCccaactaacaacccagctaacagt
P3-C1	CTCTTAAccaactaacaacccagctaacagt
P3-C2	CTGAACCccaactaacaacccagctaacagt
P3-C3	CTGCGACccaactaacaacccagctaacagt
P3-C4	CTGGCGTccaactaacaacccagctaacagt
P3-C5	CTGGTCGccaactaacaacccagctaacagt
P3-C6	CTTAATTccaactaacaacccagctaacagt
P3-C7	CTTCCGAccaactaacaacccagctaacagt
P3-C8	GAACTGGccaactaacaacccagctaacagt
P3-C9	GAATGGTccaactaacaacccagctaacagt
P3-C10	GACGCAAccaactaacaacccagctaacagt
P3-C11	GACGTCTccaactaacaacccagctaacagt
Fw-4676 (apg9-2)	CAGCAAAGCATCAGAGGACAATGGCA
Rv-4676 (apg9-2)	ACCCTTTGTCACGTCTCCGAGTCA
Fw-7209 (apg9-2)	TGAGGCACCACACTGCACCTAAATGA
Rv-7209 (apg9-2)	TTGCAGTATCCATGTTACCGACAATGAAA
Fw-CCAMK	CTATGATGGACGAAGAGAAGAGAG
Rv-CCAMK	CTATGATGGACGAAGAGAAGAGAG
Fw-NFR1	TGCAGGAACCTTCGTGCTTCTG
Rv-NFR1	GGAGAACCTTTATCTCACAGACAG
Fw-NFR5	ATGGCTGTCTTCTTTCTTACCTC
Rv-NFR5	TTAACGTGCAGTAATGGAAGTCAC
NFR5 Rv2	GCGCTCTGGCAACAAATATGG
NFR5 Rv3	CAACCTTGCACTCATCGCTG
NFR5 Rv4	CCATGGCGAAATTCGCTATCTTGG
Fw-NIN	GGATCAGCTAGCATGGAATATGG
Rv-NIN	GGTGTTATGTTAAGATGGGCTGC
Fw-NSP1	CTACAACAACAATGACCATGGAACC
Rv-NSP1	TCAGCTTGTGCCACCCTGGTCATTC
Fw-NSP2	CTTACCCTTCTCCCTTCTCACAC
Rv-NSP2	CTGAAGCGATTTAACAGCTATGCAC
Fw-SYMRK	ATGATGGAGTTACCAGCTACTAGG
Rv-SYMRK	CTATCTCGGCTGTGGGTGAGACAAG
